# Supplementary material
Source: PubMed Central journal article supplement (PMC4631050)
Supplement: NIHMS725726-supplement.pdf [file NIHMS725726-supplement.pdf]

## Supporting Information

### Synthesis and biological evaluation of novel 4,5-disubstituted 2*H*-1,2,3-triazoles as *cis*-constrained analogues of combretastatin A-4

Nikhil R. Madadi<sup>a</sup>, Narsimha R. Penthala<sup>a</sup>, Kevin Howk<sup>ab</sup>, Amit Ketkar<sup>c</sup>, Robert L. Eoff<sup>c</sup>, Michael J. Borrelli<sup>b</sup> and Peter A. Crooks<sup>a\*</sup>

<sup>a</sup> Department of Pharmaceutical Sciences, College of Pharmacy, University of Arkansas for Medical Sciences, Little Rock, AR 72205-7199, USA

<sup>b</sup> Department of Radiology, College of Medicine, University of Arkansas for Medical Sciences, Little Rock, AR 72205-7199, USA

<sup>c</sup> Department of Biochemistry and Molecular Biology, University of Arkansas for Medical Sciences, Little Rock, AR 72205-7199, U.S.A.

\*Corresponding author: Tel.: +1-501-686-6495; fax: +1-501-686-6057; E-mail: [pacrooks@uams.edu](mailto:pacrooks@uams.edu).

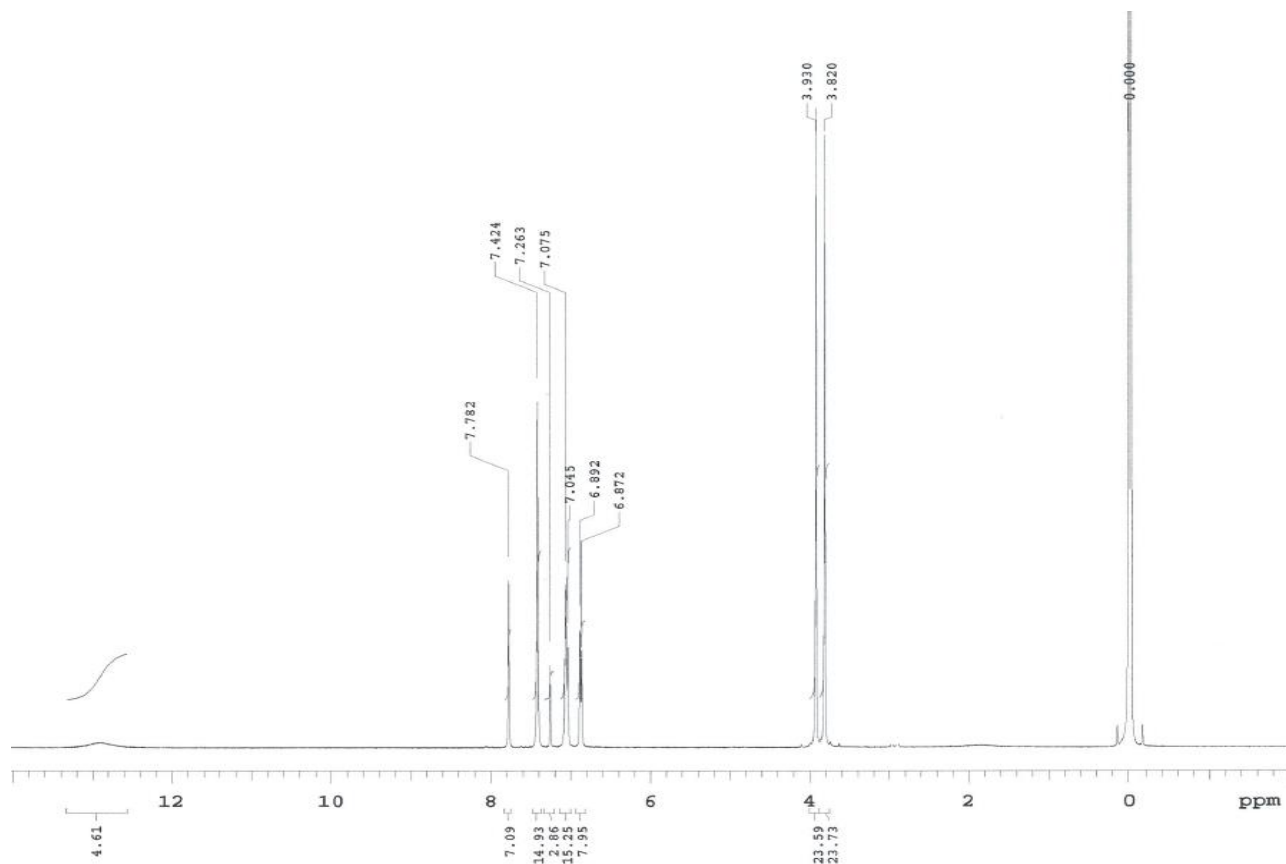

Representative <sup>1</sup>H NMR spectra of compound 4-(3,4-dichlorophenyl)-5-(3,4-dimethoxyphenyl)-2H-1,2,3-triazole (2a)

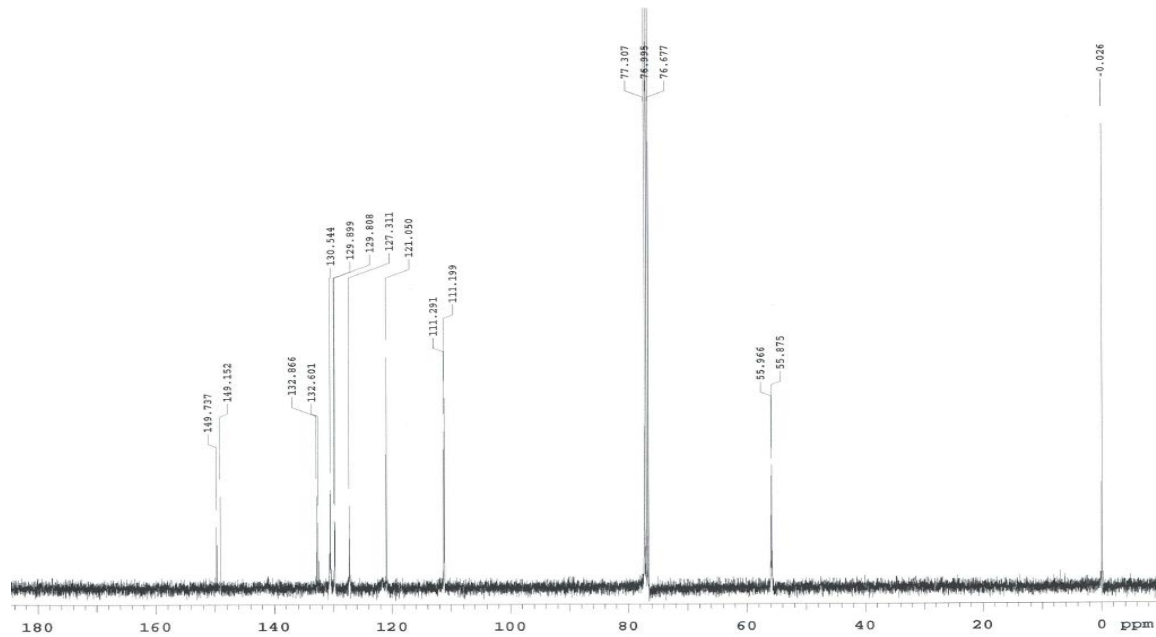

Representative <sup>13</sup>C NMR spectra of compound 4-(3,4-dichlorophenyl)-5-(3,4-dimethoxyphenyl)-2H-1,2,3-triazole (2a)

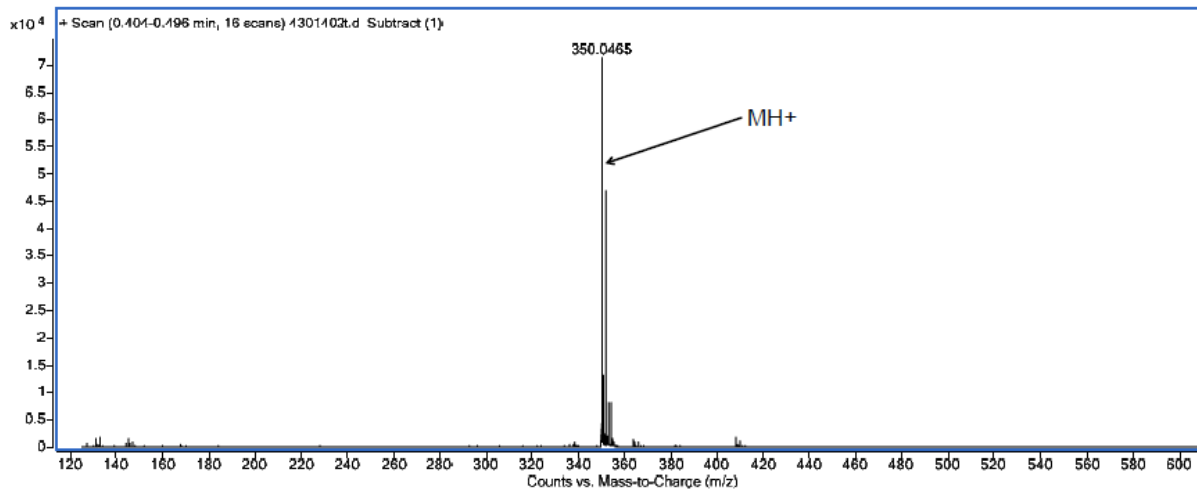

Measured Mass 350.0465

| <u>Element</u> | <u>Low Limit</u> | <u>High Limit</u> |
|----------------|------------------|-------------------|
| C              | 5                | 25                |
| H              | 5                | 25                |
| N              | 0                | 5                 |
| O              | 0                | 7                 |
| Cl             | 0                | 2                 |

| <u>Formula</u>                                                                | <u>Calculated Mass</u> | <u>mDaError</u> | <u>ppmError</u> | <u>RDB</u> |
|-------------------------------------------------------------------------------|------------------------|-----------------|-----------------|------------|
| C <sub>18</sub> H <sub>16</sub> O <sub>3</sub> Cl <sub>2</sub>                | 350.0471               | -0.6            | -1.7            | 10         |
| C <sub>16</sub> H <sub>14</sub> N <sub>3</sub> O <sub>2</sub> Cl <sub>2</sub> | 350.0458               | 0.7             | 2.1             | 10.5       |
| C <sub>25</sub> H <sub>6</sub> N <sub>2</sub> O                               | 350.0475               | -1.0            | -2.8            | 24         |
| C <sub>19</sub> H <sub>11</sub> N <sub>2</sub> O <sub>3</sub> Cl              | 350.0453               | 1.2             | 3.5             | 15         |
| C <sub>22</sub> H <sub>9</sub> N <sub>3</sub> Cl                              | 350.0480               | -1.5            | -4.1            | 19.5       |
| C <sub>22</sub> H <sub>8</sub> N <sub>4</sub> O                               | 350.0448               | 1.7             | 4.9             | 19.5       |

***Representative HRMS spectra of compound 4-(3,4-dichlorophenyl)-5-(3,4-dimethoxy phenyl)-2H-1,2,3-triazole (2a)***

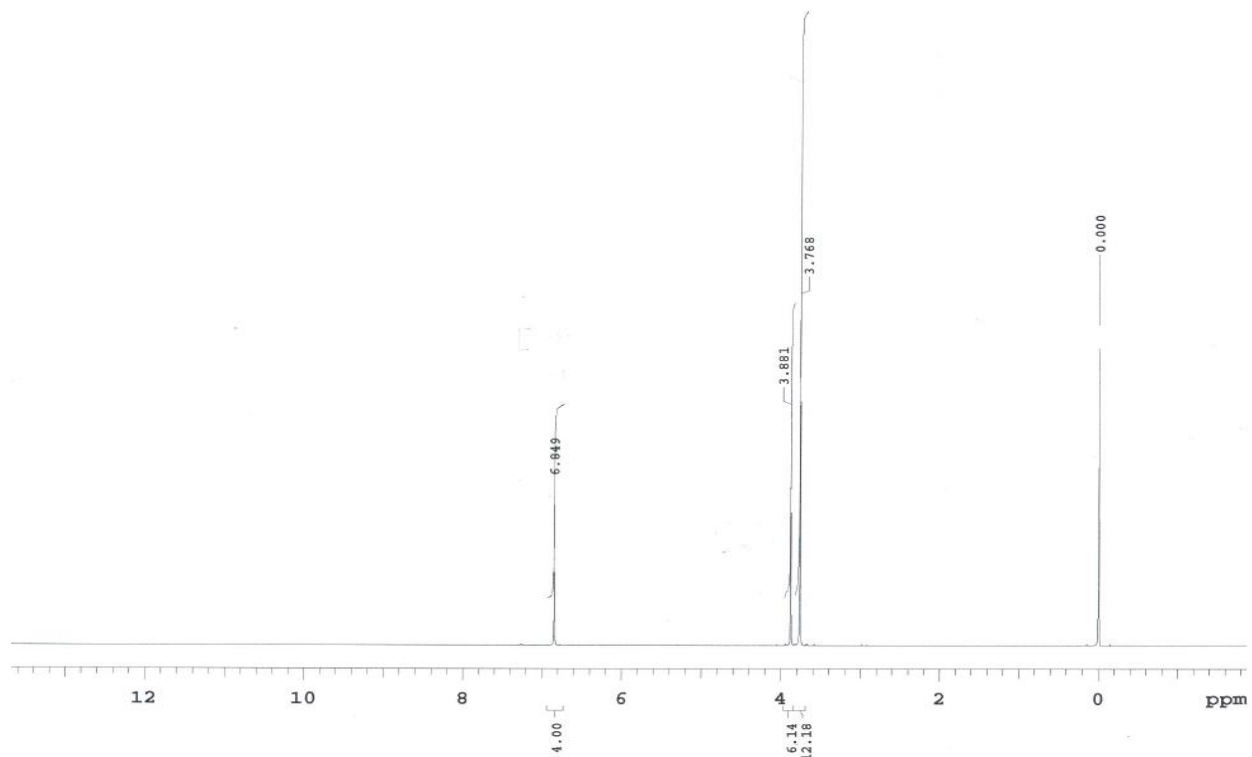

**Representative <sup>1</sup>H NMR spectra of compound 4,5-bis(3,4,5-trimethoxyphenyl)-2H-1,2,3-triazole (2b)**

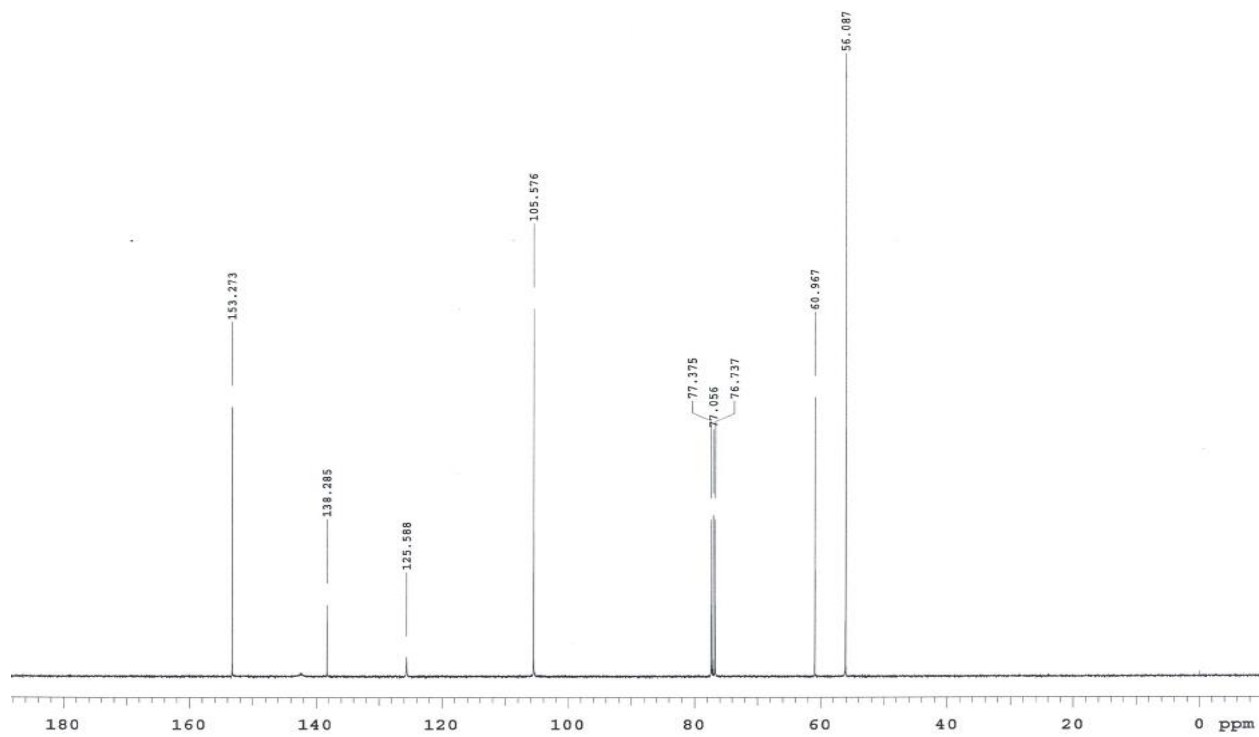

**Representative <sup>13</sup>C NMR spectra of compound 4,5-bis(3,4,5-trimethoxyphenyl)-2H-1,2,3-triazole (2b)**

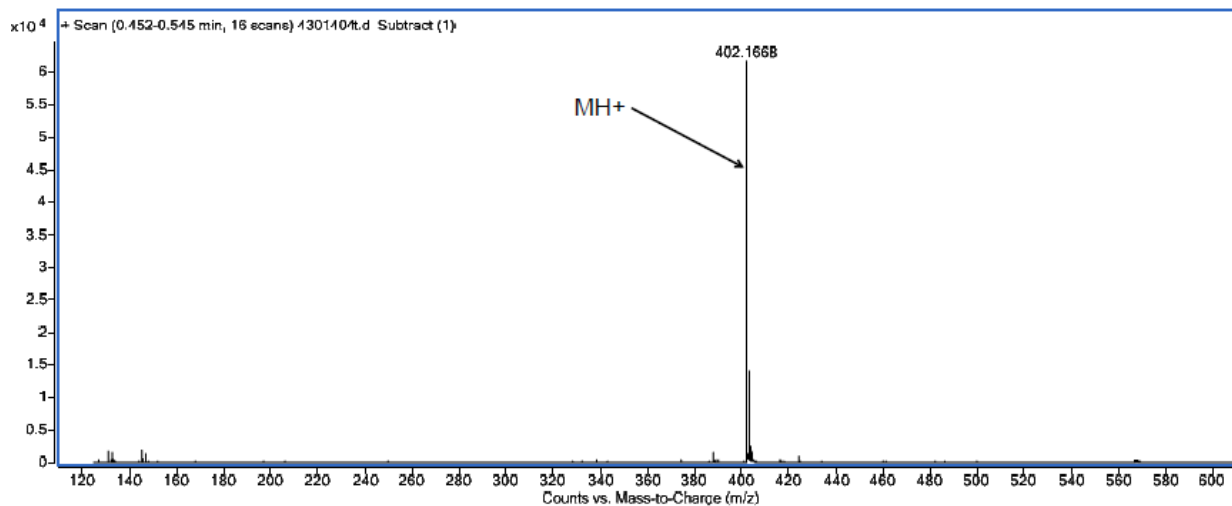

Measured Mass

402.1668

| <u>Element</u> | <u>Low Limit</u> | <u>High Limit</u> |
|----------------|------------------|-------------------|
| C              | 5                | 25                |
| H              | 5                | 25                |
| N              | 0                | 5                 |
| O              | 0                | 7                 |
| Cl             | 0                | 2                 |

| <u>Formula</u>                                                | <u>Calculated Mass</u> | <u>mDaError</u> | <u>ppmError</u> | <u>RDB</u> |
|---------------------------------------------------------------|------------------------|-----------------|-----------------|------------|
| C <sub>20</sub> H <sub>24</sub> N <sub>3</sub> O <sub>6</sub> | 402.1660               | 0.8             | 2.1             | 10.5       |
| C <sub>23</sub> H <sub>22</sub> N <sub>4</sub> O <sub>3</sub> | 402.1686               | -1.8            | -4.6            | 15         |

*Representative HRMS spectra of compound 4,5-bis(3,4,5-trimethoxyphenyl)-2H-1,2,3-triazole (2b)*

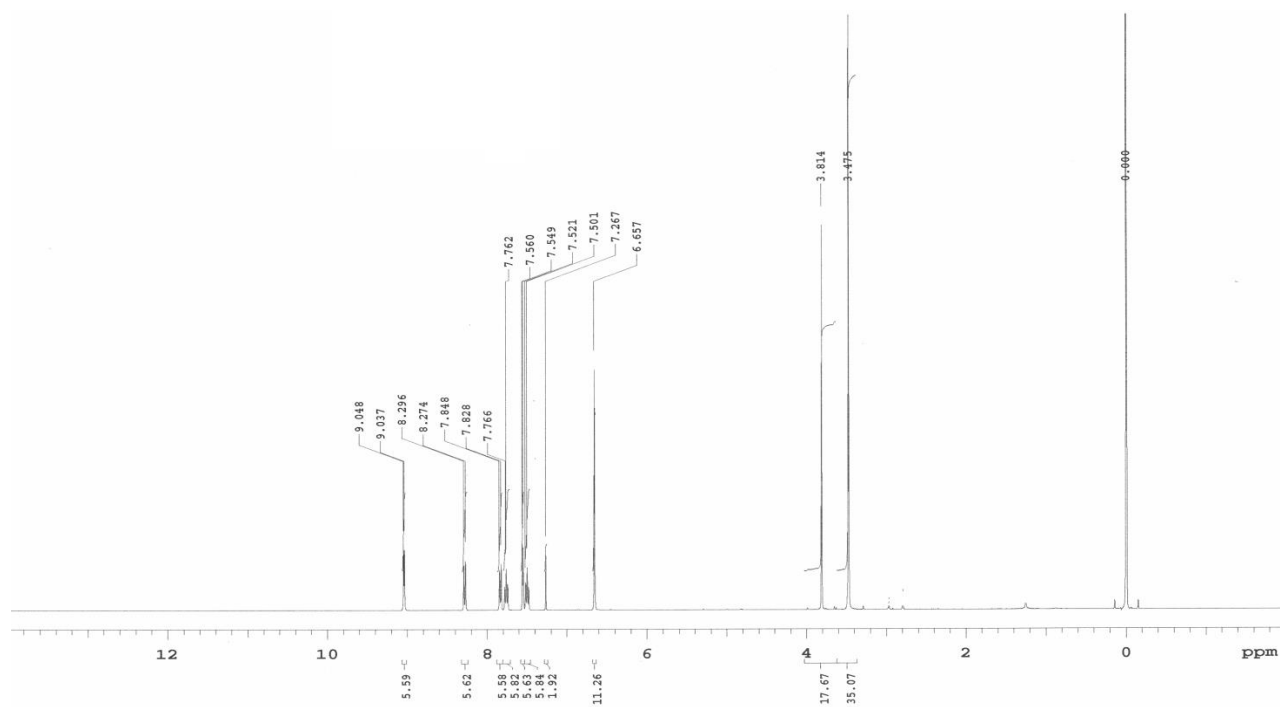

**Representative  $^1\text{H}$  NMR spectra of compound 4-(5-(3,4,5-trimethoxyphenyl)-2H-1,2,3-triazol-4-yl)quinolone (2c)**

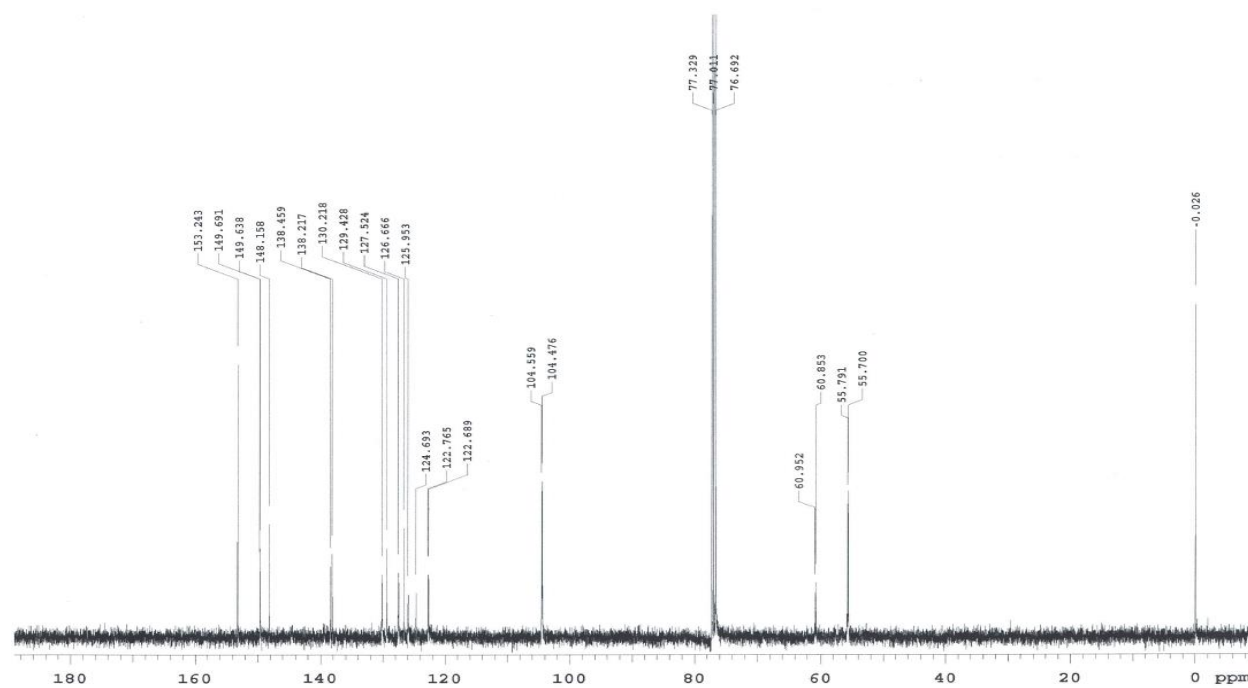

**Representative  $^{13}\text{C}$  NMR spectra of compound 4-(5-(3,4,5-trimethoxyphenyl)-2H-1,2,3-triazol-4-yl)quinolone (2c)**

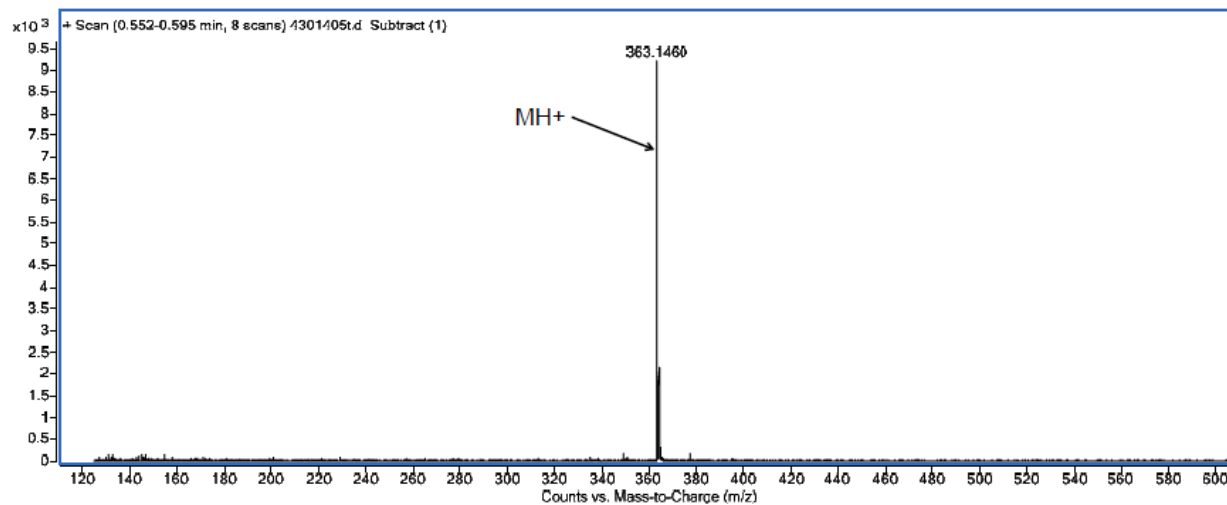

Measured Mass

363.146

| <u>Element</u> | <u>Low Limit</u> | <u>High Limit</u> |
|----------------|------------------|-------------------|
| C              | 5                | 25                |
| H              | 5                | 25                |
| N              | 0                | 5                 |
| O              | 0                | 7                 |

| <u>Formula</u> | <u>Calculated Mass</u> | <u>mDaError</u> | <u>ppmError</u> | <u>RDB</u> |
|----------------|------------------------|-----------------|-----------------|------------|
| C22 H21 N O4   | 363.1465               | -0.5            | -1.4            | 13         |
| C20 H19 N4 O3  | 363.1452               | 0.8             | 2.3             | 13.5       |

*Representative HRMS spectra of compound 4-(5-(3,4,5-trimethoxyphenyl)-2H-1,2,3-triazol-4-yl)quinolone (2c)*

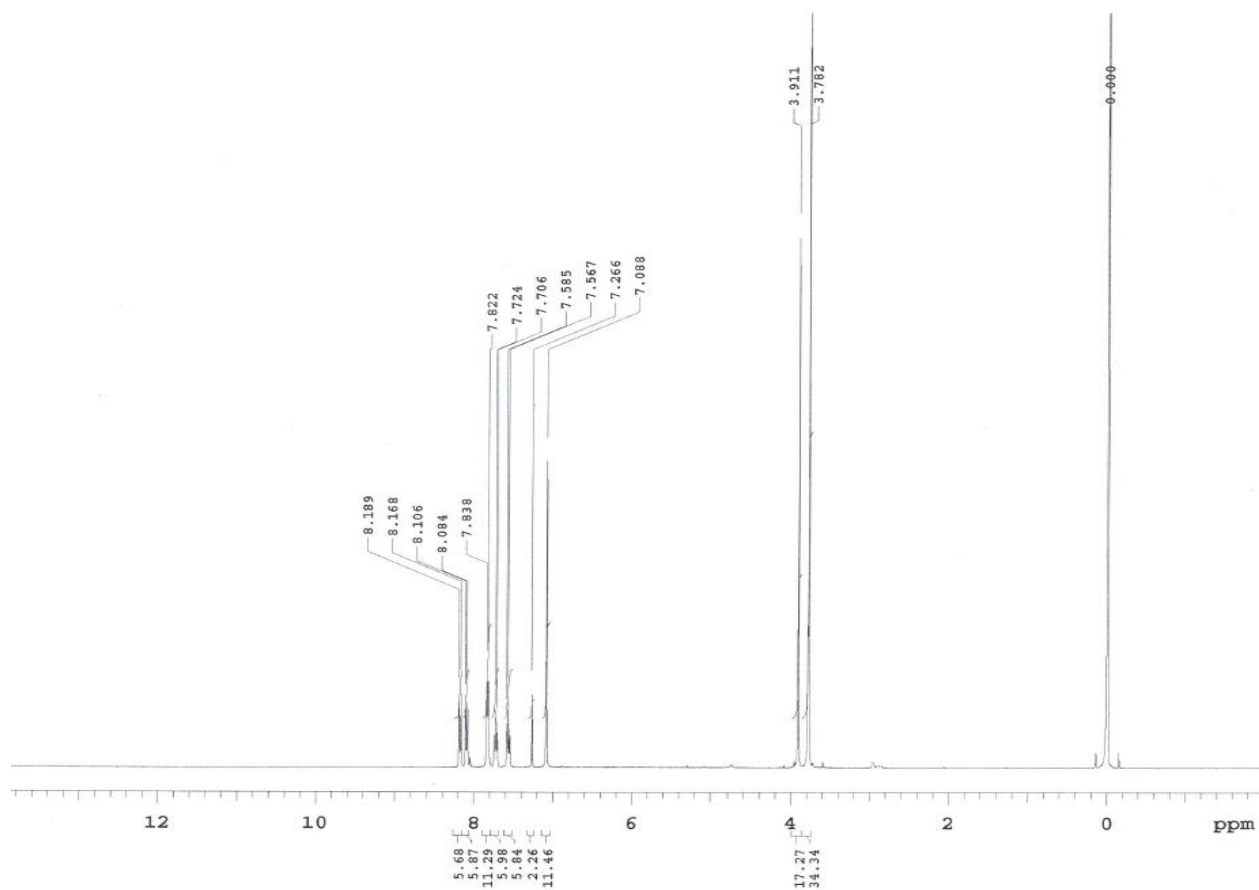

Representative  $^1\text{H}$  NMR spectra of compound 2-(5-(3,4,5-trimethoxyphenyl)-2H-1,2,3-triazol-4-yl)quinolone (2d)

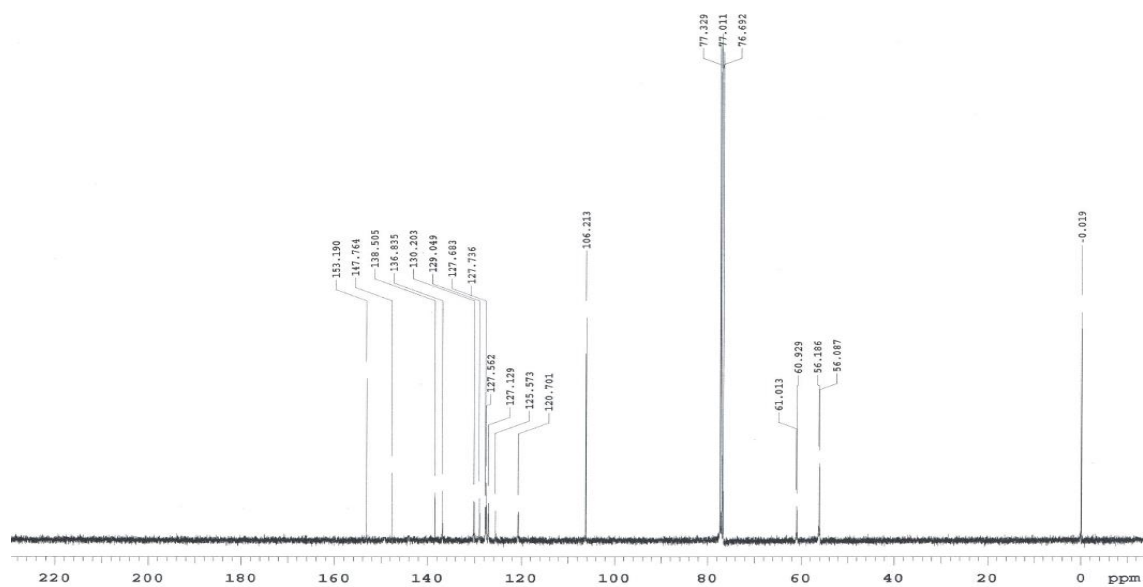

Representative  $^{13}\text{C}$  NMR spectra of compound 2-(5-(3,4,5-trimethoxyphenyl)-2H-1,2,3-triazol-4-yl)quinolone (2d)



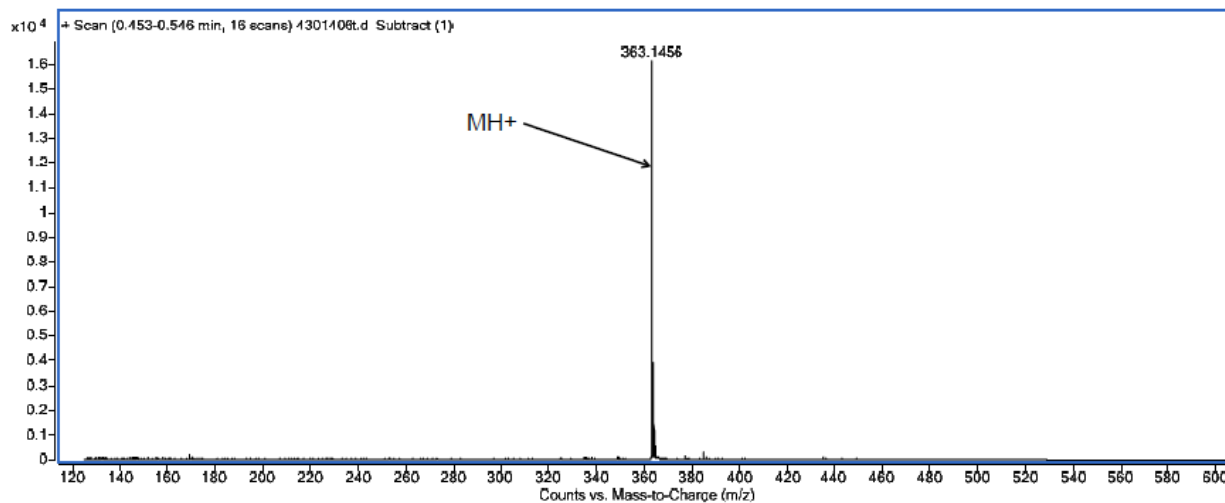

Measured Mass

363.1456

| <u>Element</u> | <u>Low Limit</u> | <u>High Limit</u> |
|----------------|------------------|-------------------|
| C              | 5                | 25                |
| H              | 5                | 25                |
| N              | 0                | 5                 |
| O              | 0                | 7                 |

| <u>Formula</u>                                                | <u>Calculated Mass</u> | <u>mDaError</u> | <u>ppmError</u> | <u>RDB</u> |
|---------------------------------------------------------------|------------------------|-----------------|-----------------|------------|
| C <sub>20</sub> H <sub>19</sub> N <sub>4</sub> O <sub>3</sub> | 363.1452               | 0.4             | 1.2             | 13.5       |
| C <sub>22</sub> H <sub>21</sub> N O <sub>4</sub>              | 363.1465               | -0.9            | -2.5            | 13         |
| C <sub>19</sub> H <sub>23</sub> O <sub>7</sub>                | 363.1438               | 1.8             | 4.9             | 8.5        |

*Representative HRMS spectra of compound 2-(5-(3,4,5-trimethoxyphenyl)-2H-1,2,3-triazol-4-yl)quinolone (2d)*

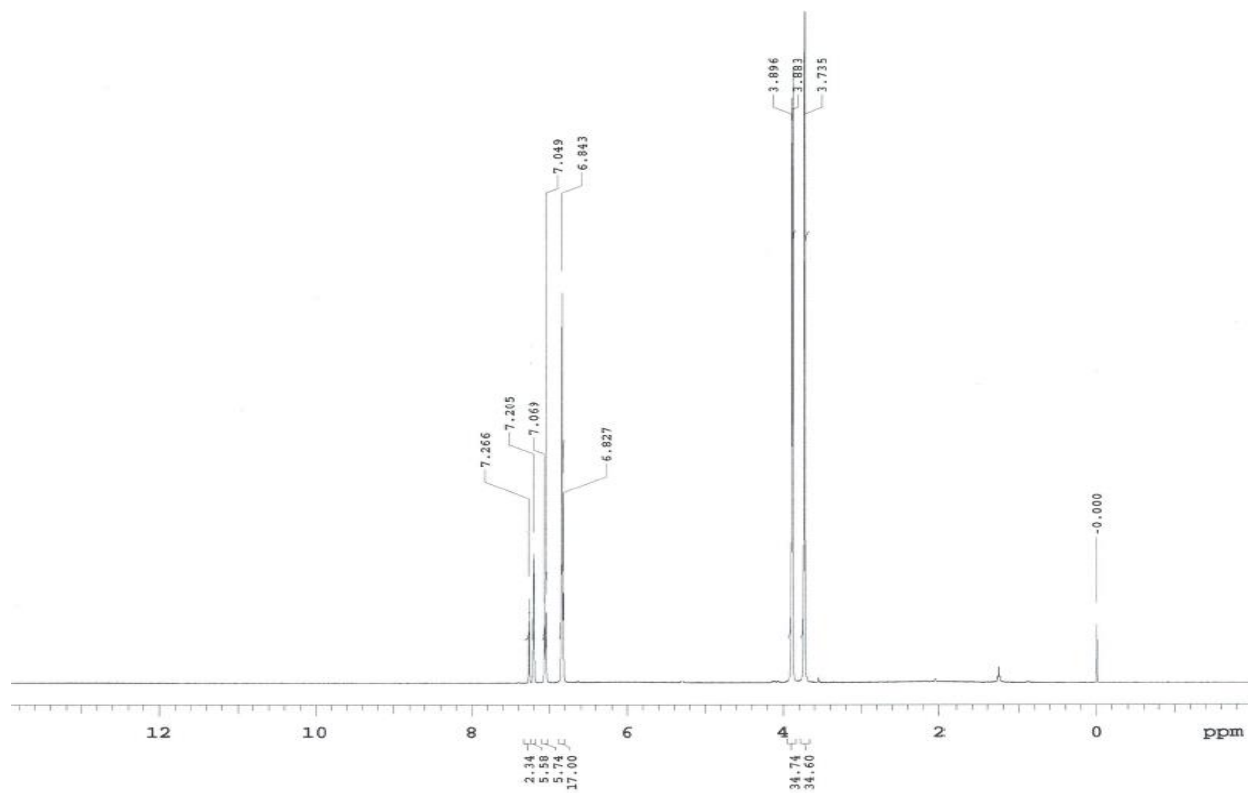

Representative <sup>1</sup>H NMR spectra of compound 2-methoxy-5-(5-(3,4,5-trimethoxyphenyl)-2H-1,2,3-triazol-4-yl)phenol (2e)

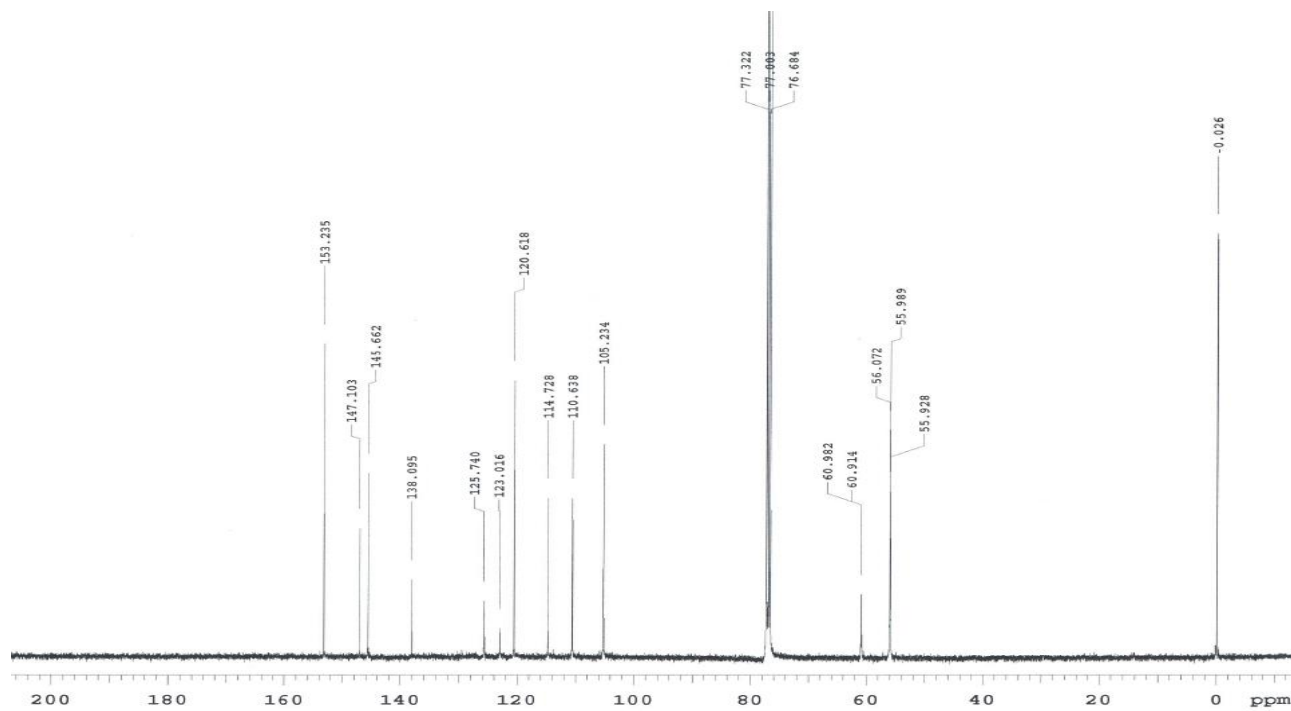

Representative <sup>13</sup>C NMR spectra of compound 2-methoxy-5-(5-(3,4,5-trimethoxyphenyl)-2H-1,2,3-triazol-4-yl)phenol (2e)

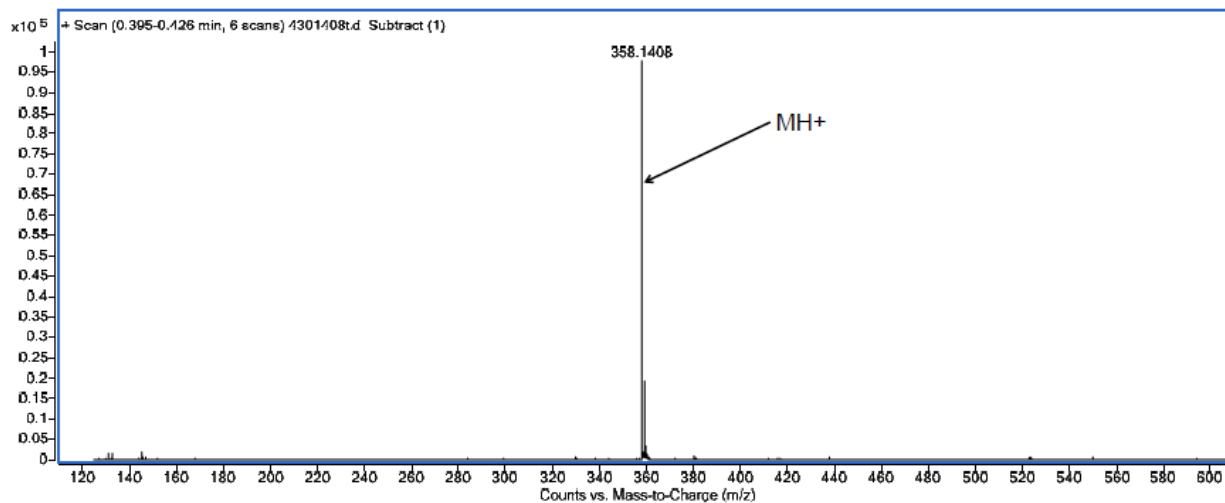

Measured Mass

358.1408

| <u>Element</u> | <u>Low Limit</u> | <u>High Limit</u> |
|----------------|------------------|-------------------|
| C              | 5                | 25                |
| H              | 5                | 25                |
| N              | 0                | 5                 |
| O              | 0                | 7                 |

| <u>Formula</u>                                                | <u>Calculated Mass</u> | <u>mDaError</u> | <u>ppmError</u> | <u>RDB</u> |
|---------------------------------------------------------------|------------------------|-----------------|-----------------|------------|
| C <sub>20</sub> H <sub>22</sub> O <sub>6</sub>                | 358.1411               | -0.3            | -0.8            | 10         |
| C <sub>18</sub> H <sub>20</sub> N <sub>3</sub> O <sub>5</sub> | 358.1397               | 1.1             | 2.9             | 10.5       |
| C <sub>21</sub> H <sub>18</sub> N <sub>4</sub> O <sub>2</sub> | 358.1424               | -1.6            | -4.5            | 15         |

*Representative HRMS spectra of compound 2-methoxy-5-(5-(3,4,5-trimethoxyphenyl)-2H-1,2,3-triazol-4-yl)phenol (2e)*

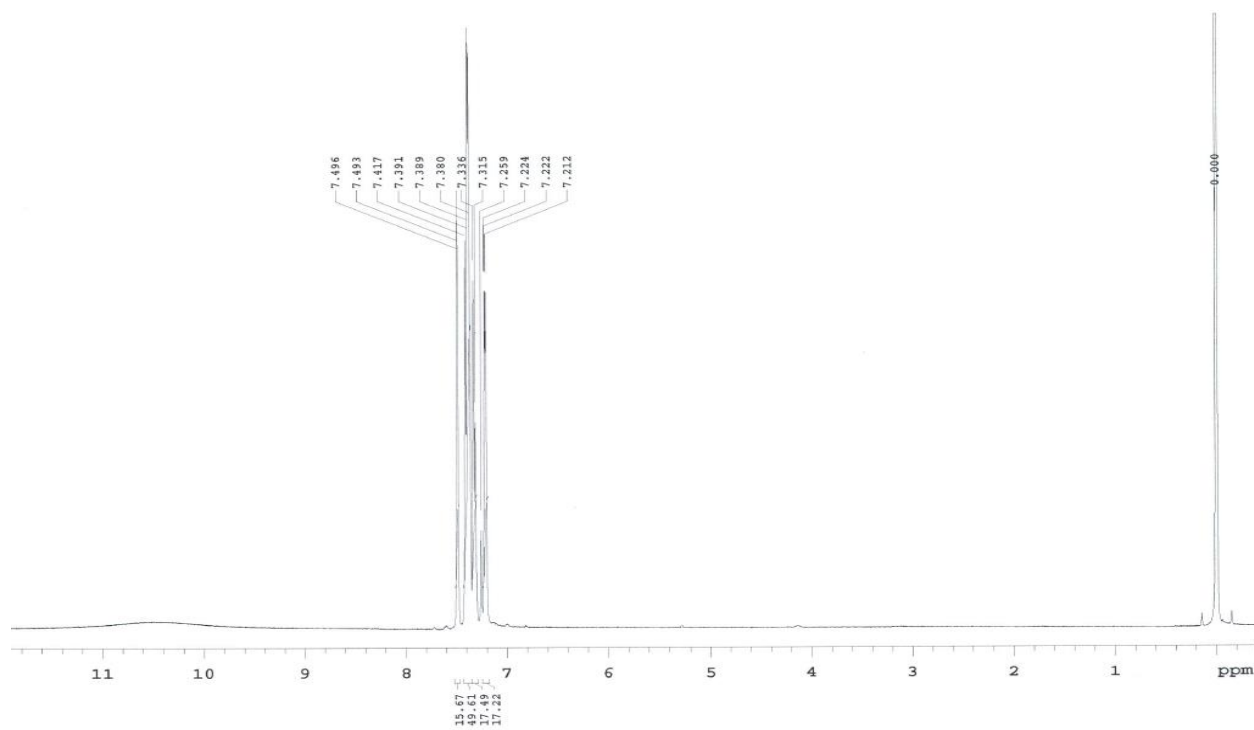

**Representative  $^1\text{H}$  NMR spectra of compound 4-(4-chloro-3-fluorophenyl)-5-(thiophen-3-yl)-2H-1,2,3-triazole (2f)**

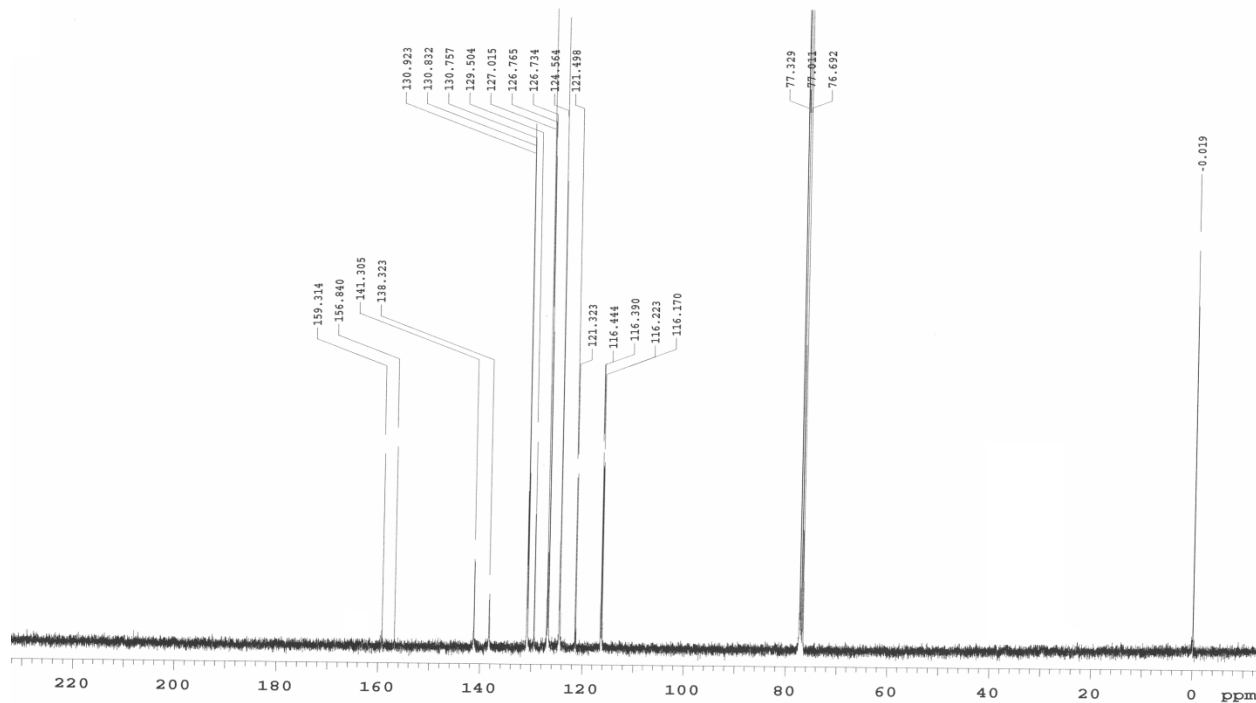

**Representative  $^{13}\text{C}$  NMR spectra of compound 4-(4-chloro-3-fluorophenyl)-5-(thiophen-3-yl)-2H-1,2,3-triazole (2f)**

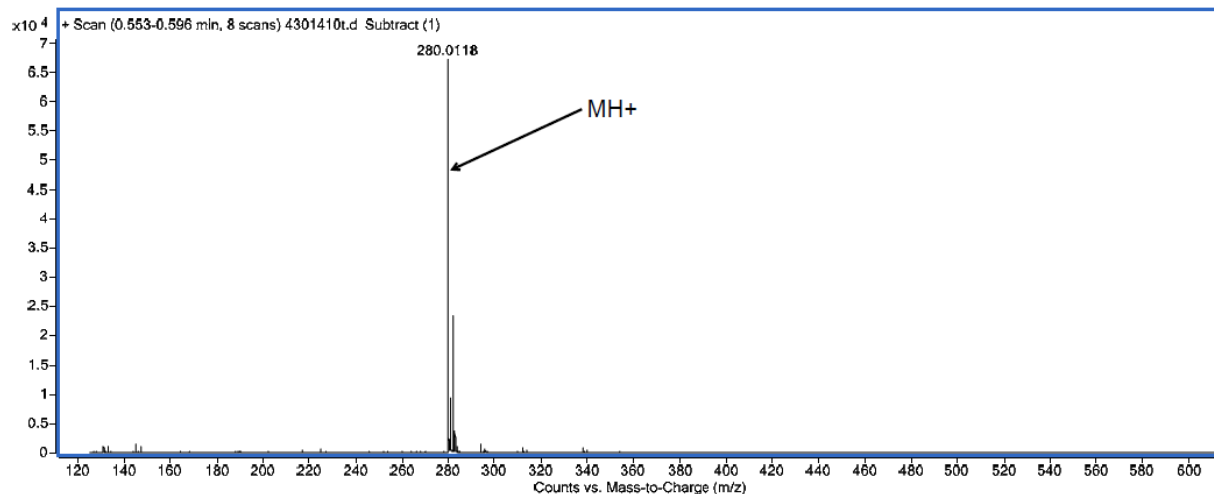

Measured Mass

280.0118

| <u>Element</u> | <u>Low Limit</u> | <u>High Limit</u> |
|----------------|------------------|-------------------|
| C              | 5                | 25                |
| H              | 5                | 25                |
| S              | 0                | 2                 |
| N              | 0                | 5                 |
| Cl             | 0                | 1                 |
| F              | 0                | 1                 |

| <u>Formula</u>          | <u>Calculated Mass</u> | <u>mDaError</u> | <u>ppmError</u> | <u>RDB</u> |
|-------------------------|------------------------|-----------------|-----------------|------------|
| C10 H7 N5 F S2          | 280.0121               | -0.3            | -1.2            | 9.5        |
| C15 H8 N2 S2            | 280.0123               | -0.5            | -1.9            | 13         |
| C17 H9 S Cl             | 280.0108               | 1.0             | 3.6             | 13         |
| <b>C12 H8 N3 F S Cl</b> | <b>280.0106</b>        | <b>1.2</b>      | <b>4.3</b>      | <b>9.5</b> |

*Representative HRMS spectra of compound 4-(4-chloro-3-fluorophenyl)-5-(thiophen-3-yl)-2H-1,2,3-triazole (2f)*

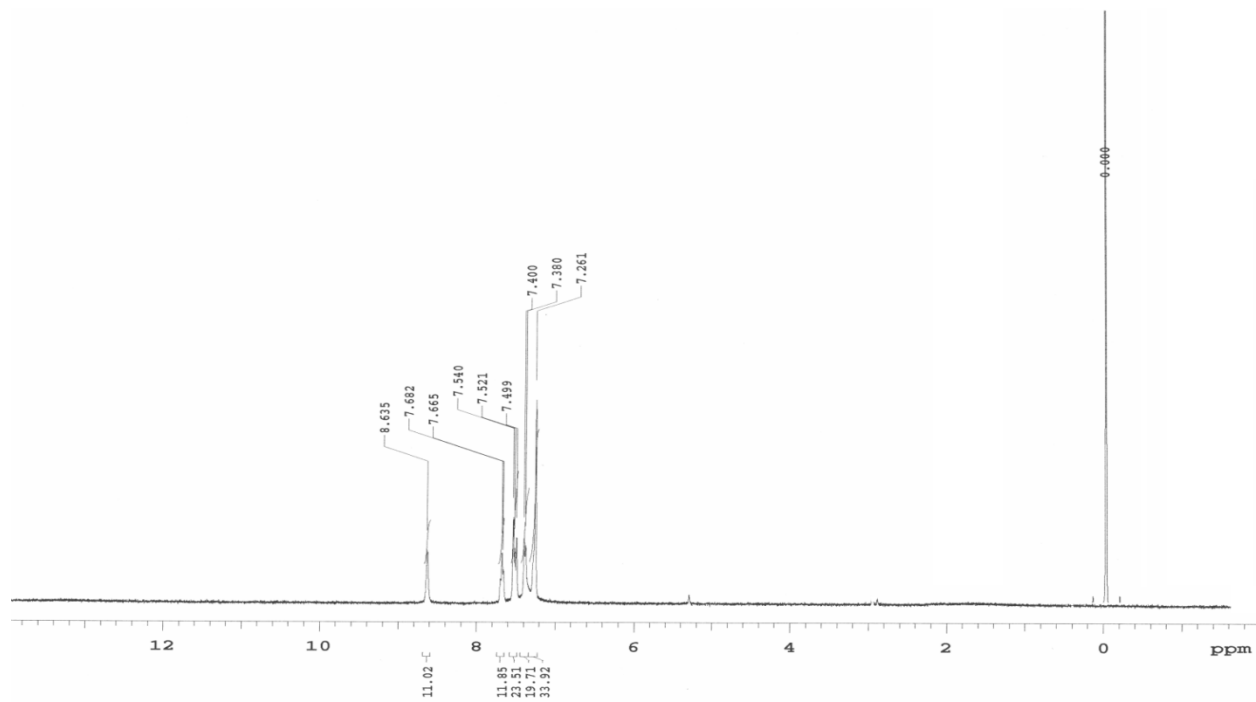

**Representative  $^1\text{H}$  NMR spectra of compound 2-(5-(2,4-dichlorophenyl)-2H-1,2,3-triazol-4-yl)pyridine (2g)**

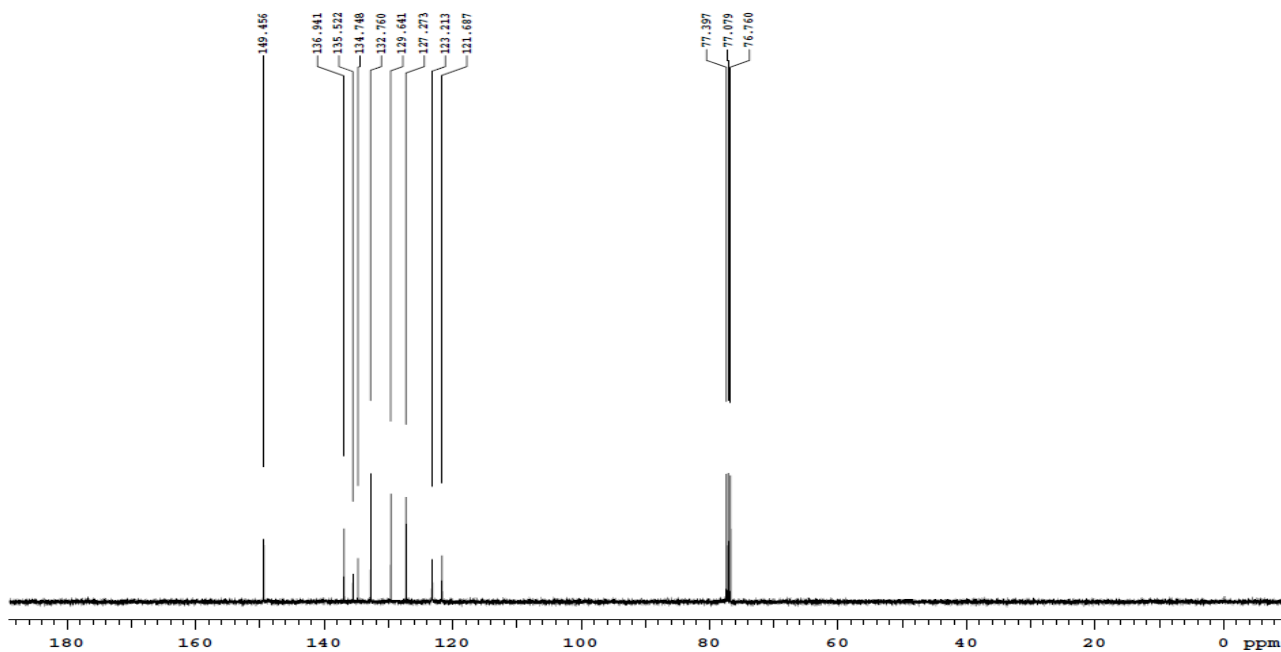

**Representative  $^{13}\text{C}$  NMR spectra of compound 2-(5-(2,4-dichlorophenyl)-2H-1,2,3-triazol-4-yl)pyridine (2g)**

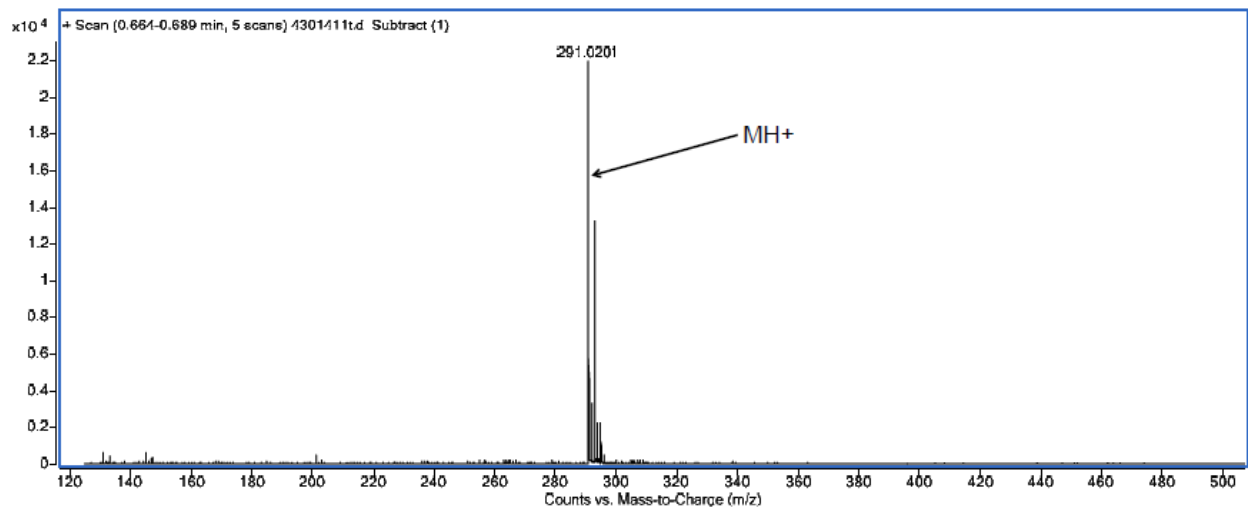

Measured Mass 291.0201

| <u>Element</u> | <u>Low Limit</u> | <u>High Limit</u> |
|----------------|------------------|-------------------|
| C              | 5                | 25                |
| H              | 5                | 25                |
| N              | 0                | 5                 |
| Cl             | 0                | 2                 |

| <u>Formula</u> | <u>Calculated Mass</u> | <u>mDaError</u> | <u>ppmError</u> | <u>RDB</u> |
|----------------|------------------------|-----------------|-----------------|------------|
| C13 H9 N4 Cl2  | 291.0199               | 0.2             | 0.8             | 10.5       |

*Representative HRMS spectra of compound 2-(5-(2,4-dichlorophenyl)-2H-1,2,3-triazol-4-yl)pyridine (2g)*

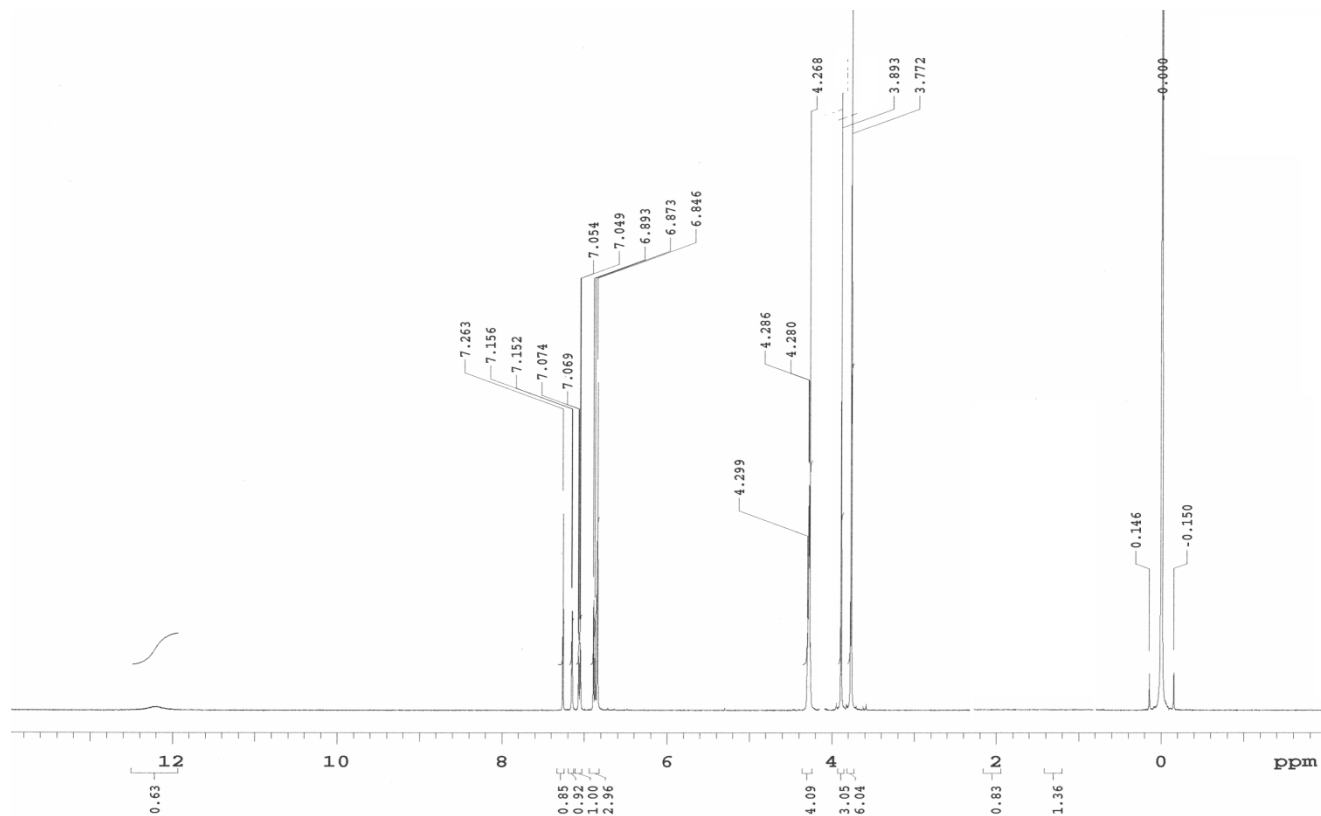

**Representative  $^1\text{H}$  NMR spectra of compound 4-(2,3-dihydrobenzo[b][1,4]dioxin-6-yl)-5-(3,4,5-trimethoxy phenyl)-2H-1,2,3-triazole (2h):**

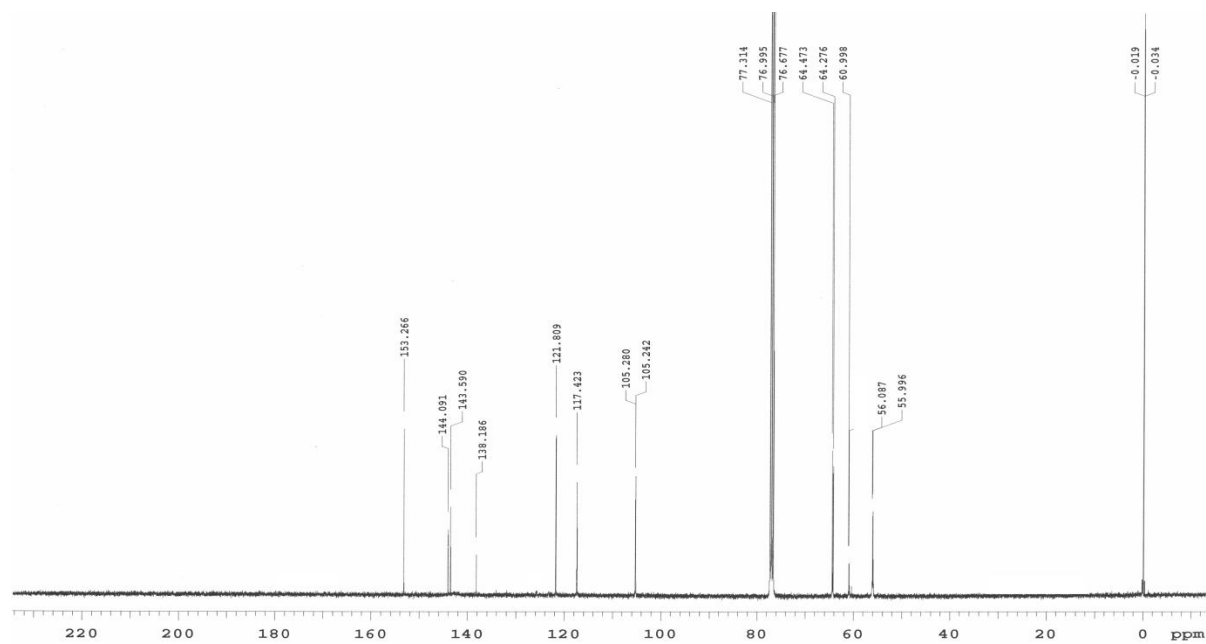

**Representative  $^{13}\text{C}$  NMR spectra of compound 4-(2,3-dihydrobenzo[b][1,4]dioxin-6-yl)-5-(3,4,5-trimethoxy phenyl)-2H-1,2,3-triazole (2h):**



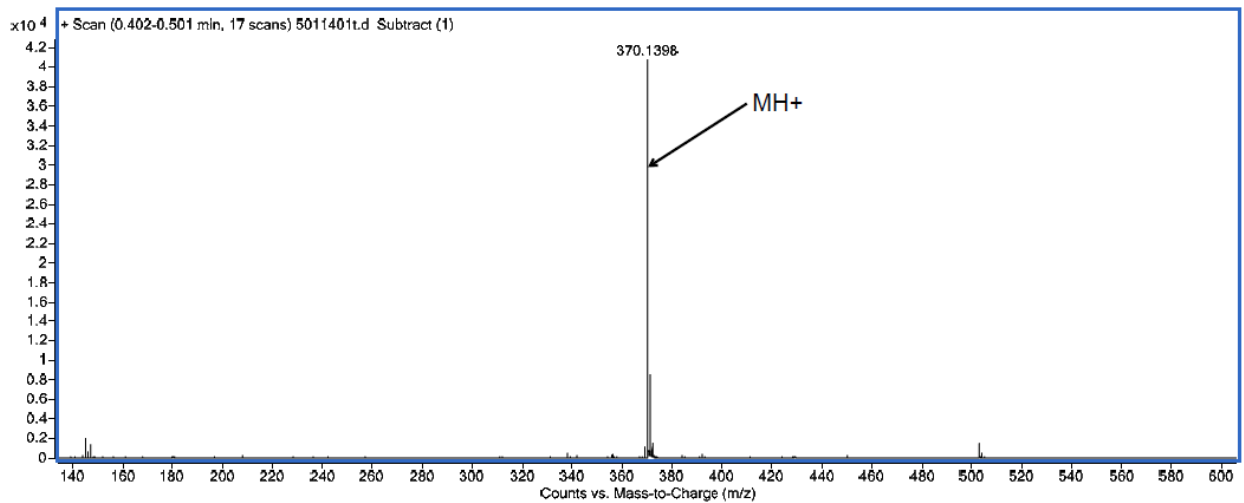

Measured Mass

370.1398

| <u>Element</u> | <u>Low Limit</u> | <u>High Limit</u> |
|----------------|------------------|-------------------|
| C              | 10               | 25                |
| H              | 5                | 25                |
| N              | 0                | 5                 |
| O              | 0                | 6                 |

| <u>Formula</u>                                                | <u>Calculated Mass</u> | <u>mDaError</u> | <u>ppmError</u> | <u>RDB</u> |
|---------------------------------------------------------------|------------------------|-----------------|-----------------|------------|
| C <sub>19</sub> H <sub>20</sub> N <sub>3</sub> O <sub>5</sub> | 370.1397               | 0.1             | 0.1             | 11.5       |
| C <sub>21</sub> H <sub>22</sub> O <sub>6</sub>                | 370.1411               | -1.3            | -3.5            | 11         |

**Representative HRMS spectra of compound 4-(2,3-dihydrobenzo[b][1,4]dioxin-6-yl)-5-(3,4,5-trimethoxy phenyl)-2H-1,2,3-triazole (2h):**

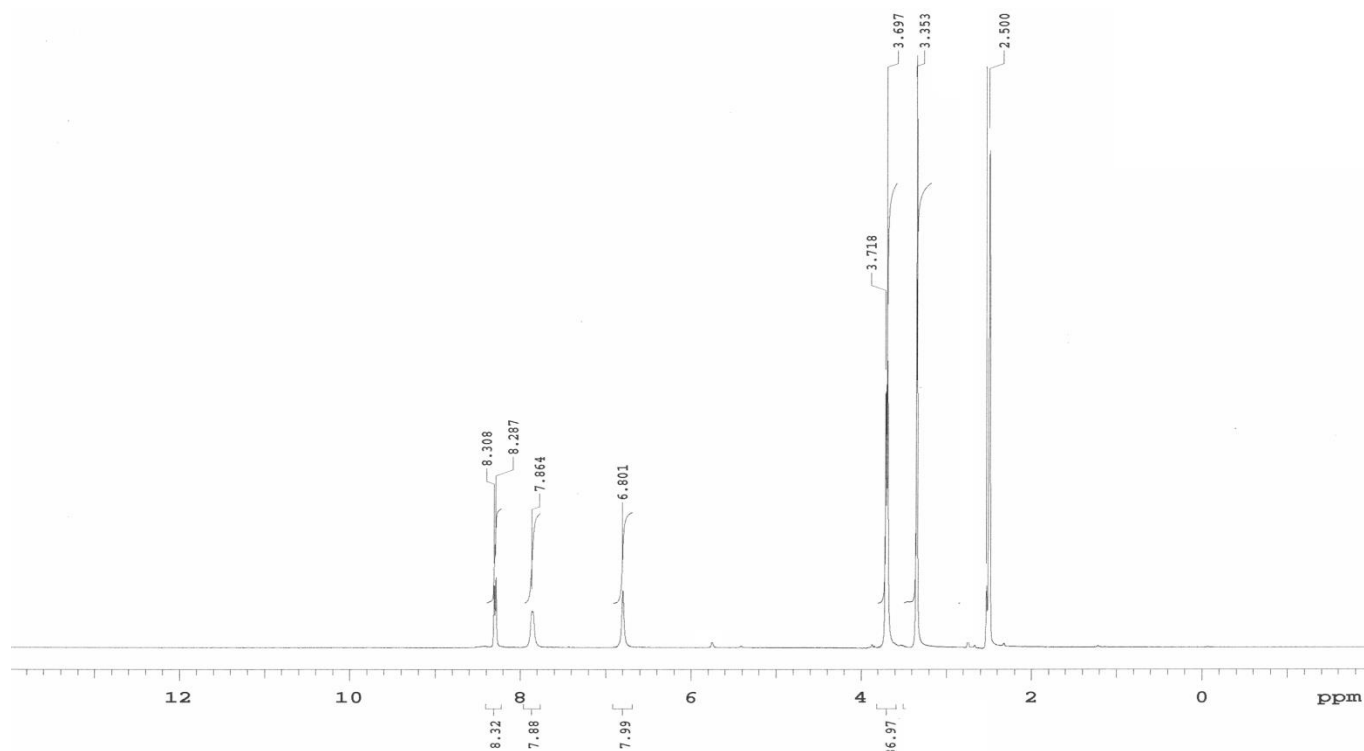

Representative  $^1\text{H}$  NMR spectra of compound 4-(4-nitrophenyl)-5-(3,4,5-trimethoxyphenyl)-2H-1,2,3-triazole (2i)

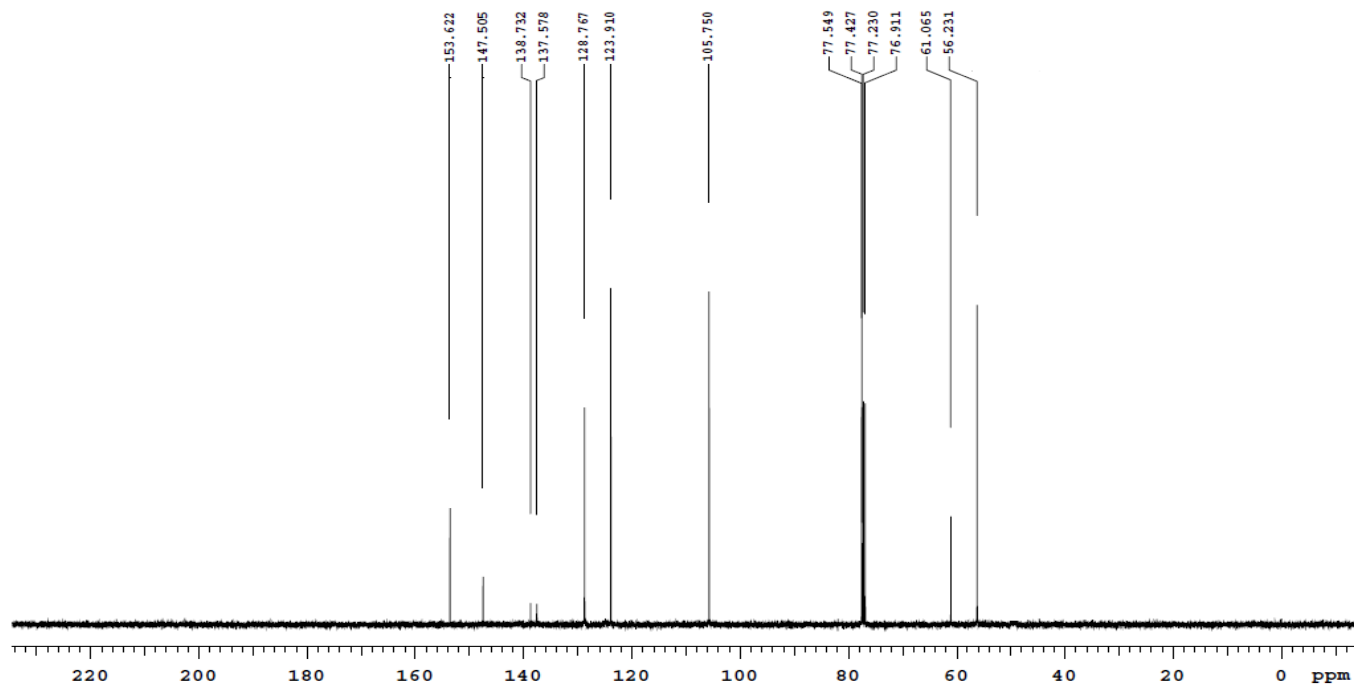

Representative  $^{13}\text{C}$  NMR spectra of compound 4-(4-nitrophenyl)-5-(3,4,5-trimethoxyphenyl)-2H-1,2,3-triazole (2i)

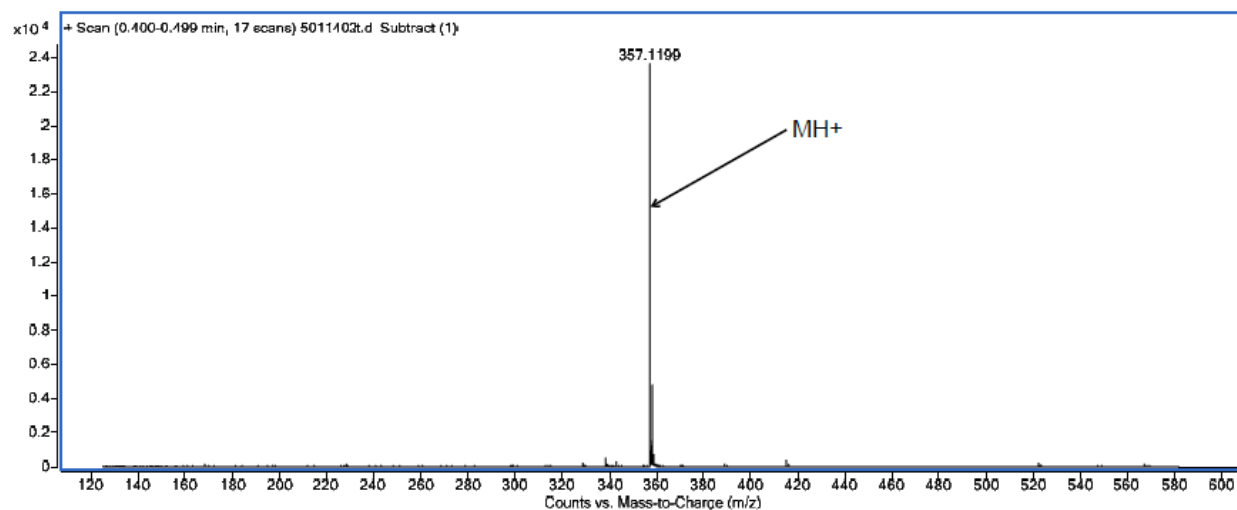

Measured Mass

357.1199

| <u>Element</u> | <u>Low Limit</u> | <u>High Limit</u> |
|----------------|------------------|-------------------|
| C              | 10               | 25                |
| H              | 5                | 25                |
| N              | 0                | 5                 |
| O              | 0                | 6                 |

| <u>Formula</u>                                                | <u>Calculated Mass</u> | <u>mDaError</u> | <u>ppmError</u> | <u>RDB</u> |
|---------------------------------------------------------------|------------------------|-----------------|-----------------|------------|
| C <sub>17</sub> H <sub>17</sub> N <sub>4</sub> O <sub>5</sub> | 357.1193               | 0.6             | 1.6             | 11.5       |
| C <sub>19</sub> H <sub>19</sub> N O <sub>6</sub>              | 357.1207               | -0.8            | -2.2            | 11         |

*Representative HRMS spectra of compound 4-(4-nitrophenyl)-5-(3,4,5-trimethoxyphenyl)-2H-1,2,3-triazole (2i)*

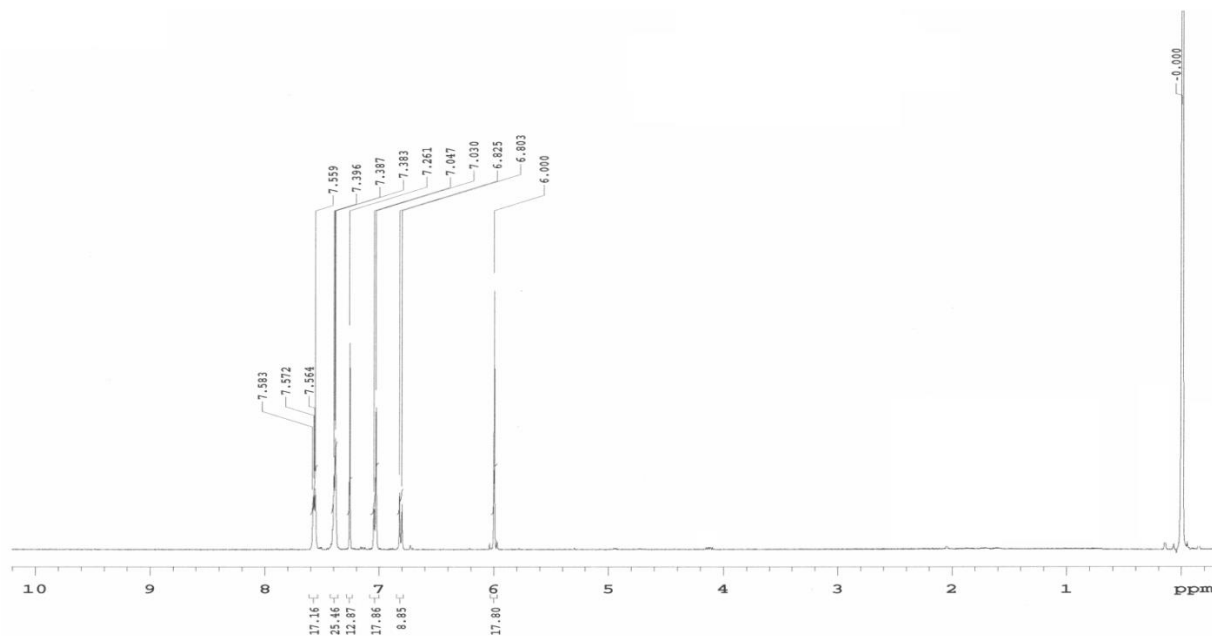

Representative  $^1\text{H}$  NMR spectra of compound 4-(benzo[d][1,3]dioxol-5-yl)-5-phenyl-2H-1,2,3-triazole (2j)

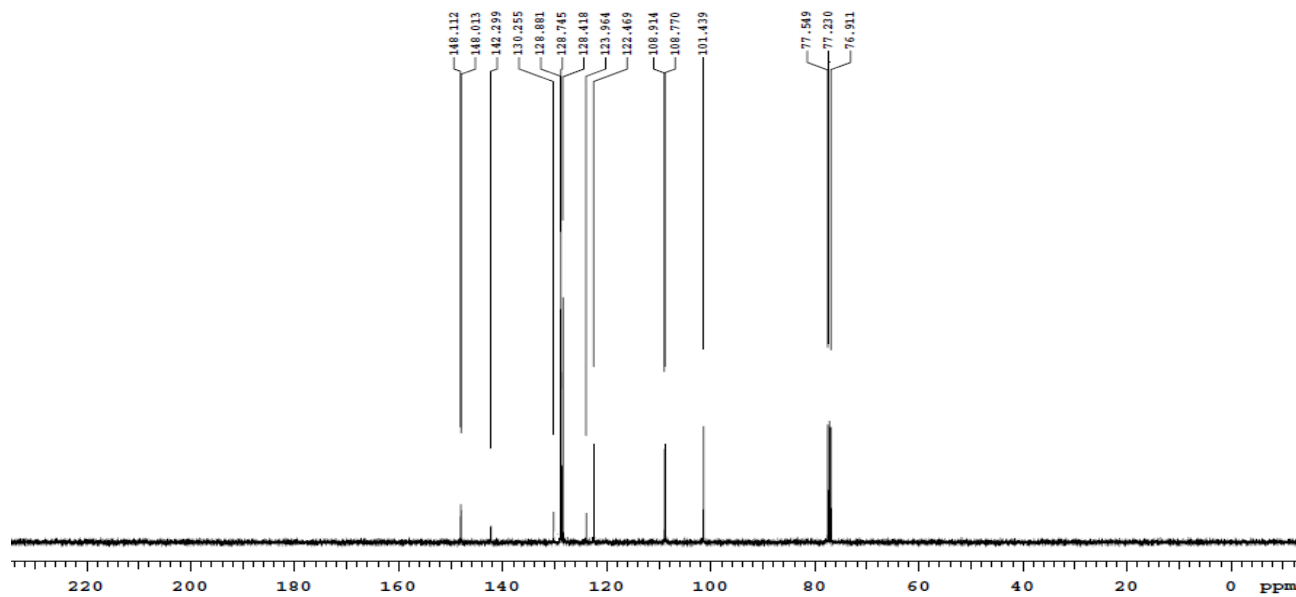

Representative  $^{13}\text{C}$  NMR spectra of compound 4-(benzo[d][1,3]dioxol-5-yl)-5-phenyl-2H-1,2,3-triazole (2j)

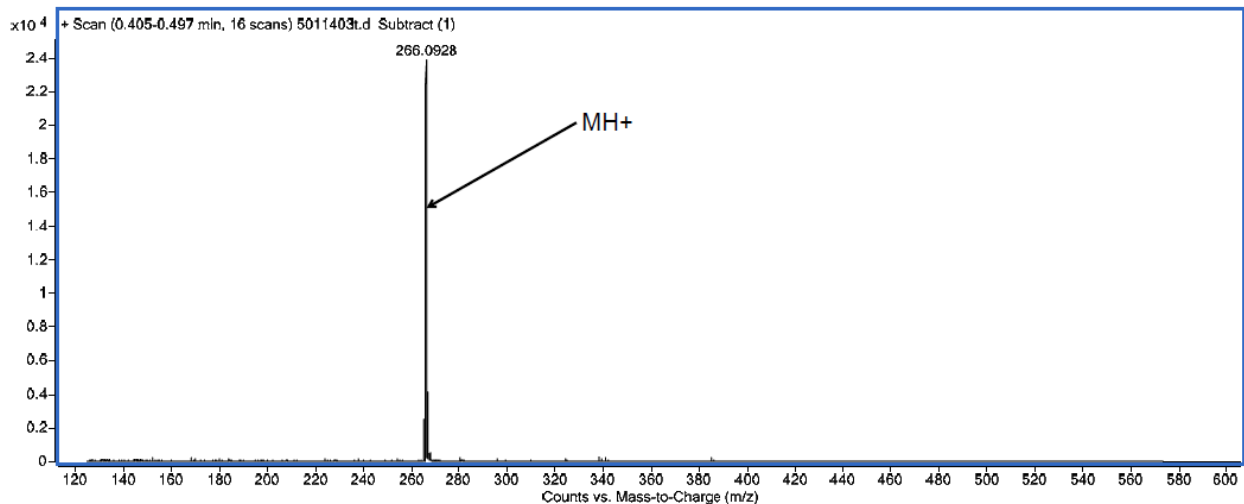

Measured Mass

266.0928

| <u>Element</u> | <u>Low Limit</u> | <u>High Limit</u> |
|----------------|------------------|-------------------|
| C              | 10               | 25                |
| H              | 5                | 25                |
| N              | 0                | 5                 |
| O              | 0                | 6                 |

| <u>Formula</u>                                                | <u>Calculated Mass</u> | <u>mDaError</u> | <u>ppmError</u> | <u>RDB</u> |
|---------------------------------------------------------------|------------------------|-----------------|-----------------|------------|
| C <sub>15</sub> H <sub>12</sub> N <sub>3</sub> O <sub>2</sub> | 266.0924               | 0.4             | 1.5             | 11.5       |
| C <sub>17</sub> H <sub>14</sub> O <sub>3</sub>                | 266.0937               | -0.9            | -3.6            | 11         |

*Representative HRMS spectra of compound 4-(benzo[d][1,3]dioxol-5-yl)-5-phenyl-2H-1,2,3-triazole (2j)*

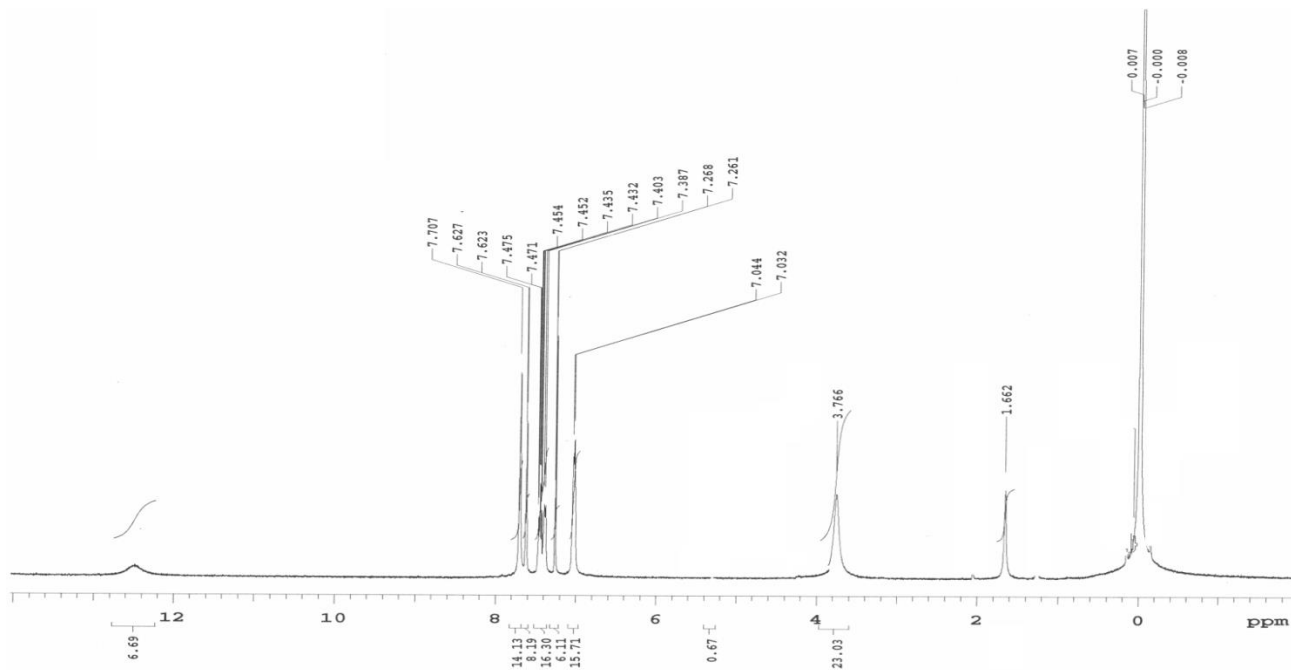

Representative <sup>1</sup>H NMR spectra of compound 4-(3,5-dibromophenyl)-5-(2-methoxyphenyl)-2H-1,2,3-triazole (2k)

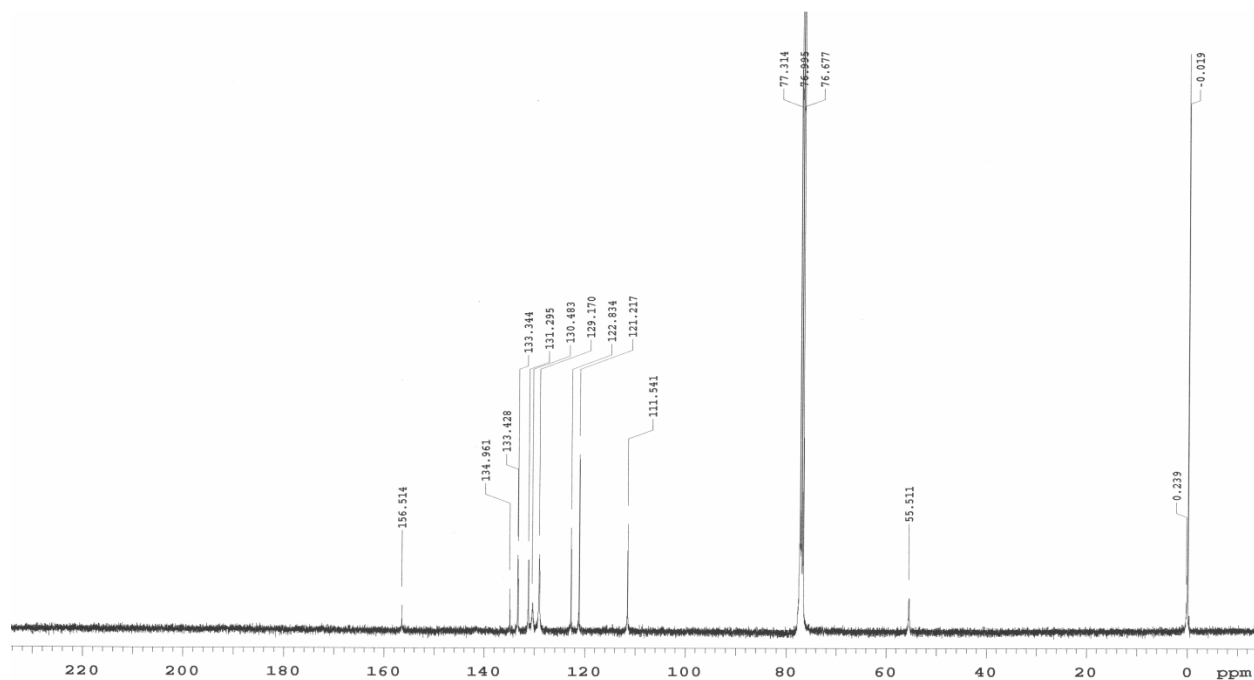

Representative <sup>13</sup>C NMR spectra of compound 4-(3,5-dibromophenyl)-5-(2-methoxyphenyl)-2H-1,2,3-triazole (2k)

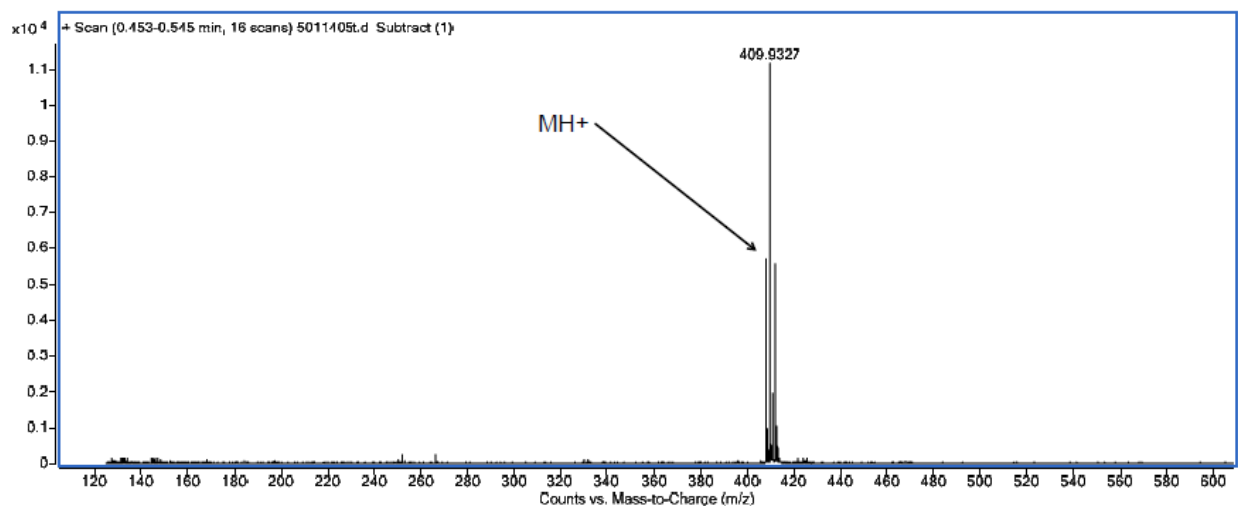

Measured Mass

407.9342

| <u>Element</u> | <u>Low Limit</u> | <u>High Limit</u> |
|----------------|------------------|-------------------|
| Br             | 0                | 2                 |
| C              | 10               | 25                |
| H              | 5                | 25                |
| N              | 0                | 5                 |
| O              | 0                | 6                 |

| <u>Formula</u>                                                   | <u>Calculated Mass</u> | <u>mDaError</u> | <u>ppmError</u> | <u>RDB</u> |
|------------------------------------------------------------------|------------------------|-----------------|-----------------|------------|
| C <sub>15</sub> H <sub>12</sub> N <sub>3</sub> O Br <sub>2</sub> | 407.9342               | 0.0             | 0.1             | 10.5       |
| C <sub>17</sub> H <sub>14</sub> O <sub>2</sub> Br <sub>2</sub>   | 407.9355               | -1.3            | -3.2            | 10         |

*Representative HRMS spectra of compound 4-(3,5-dibromophenyl)-5-(2-methoxyphenyl)-2H-1,2,3-triazole (2k)*

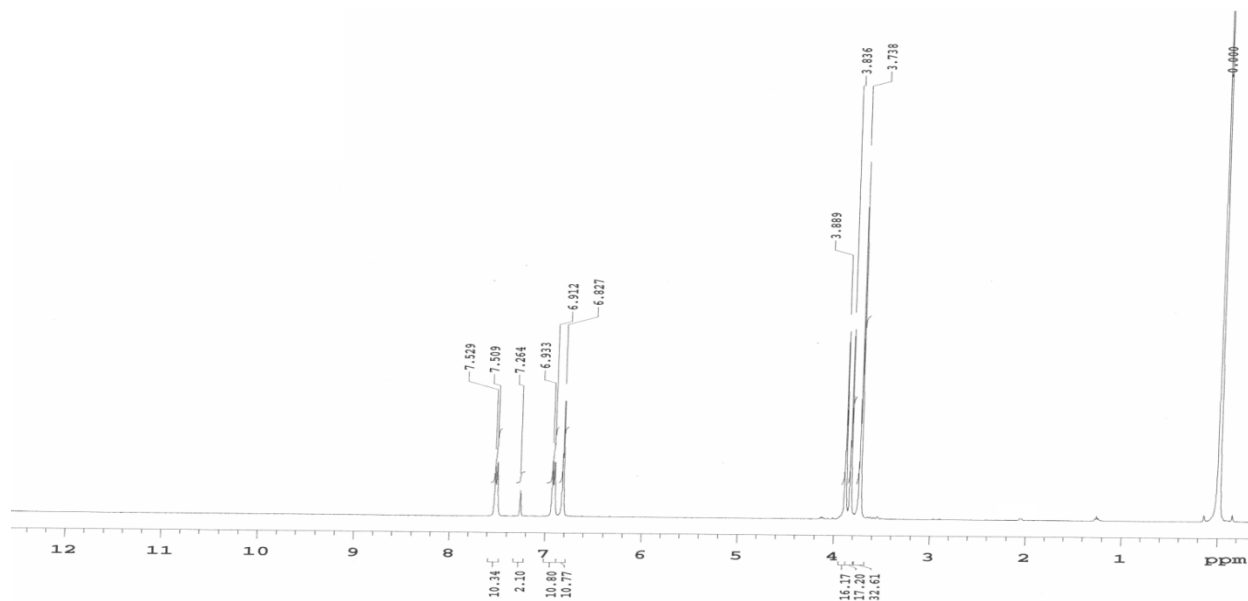

Representative <sup>1</sup>H NMR spectra of compound 4-(4-methoxyphenyl)-5-(3,4,5-trimethoxyphenyl)-2H-1,2,3-triazole (2l)

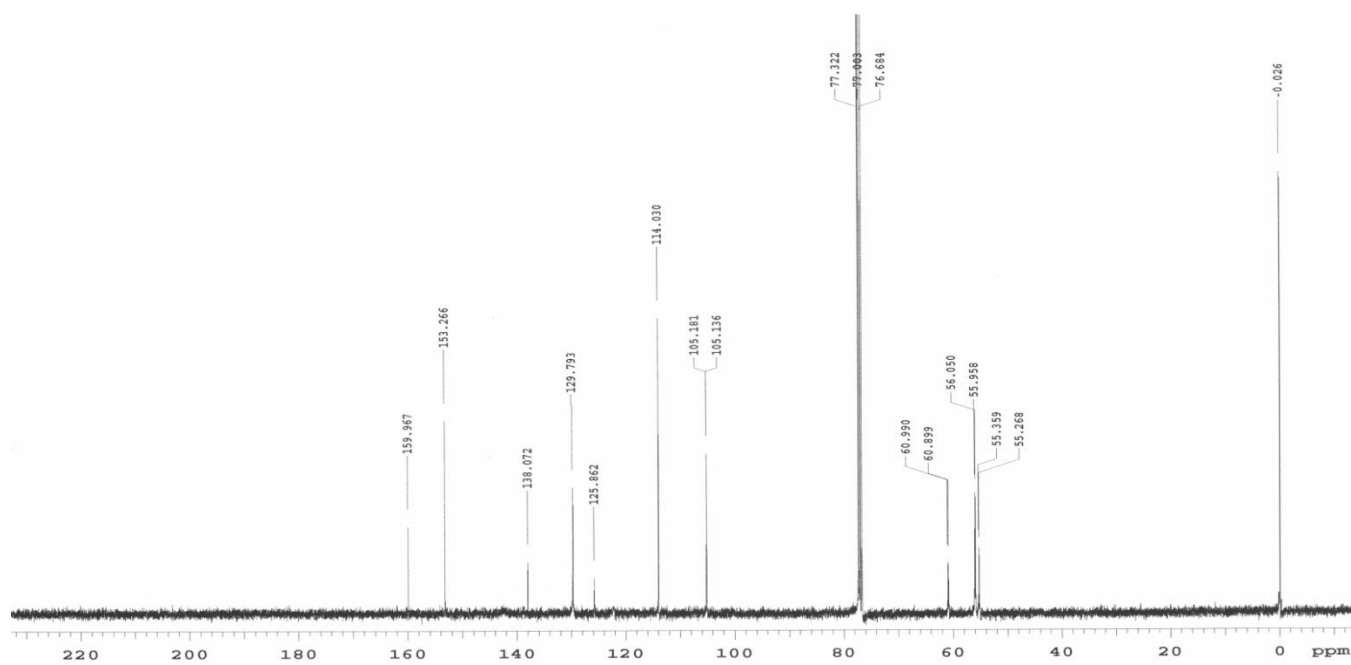

Representative <sup>13</sup>C NMR spectra of compound 4-(4-methoxyphenyl)-5-(3,4,5-trimethoxyphenyl)-2H-1,2,3-triazole (2l)



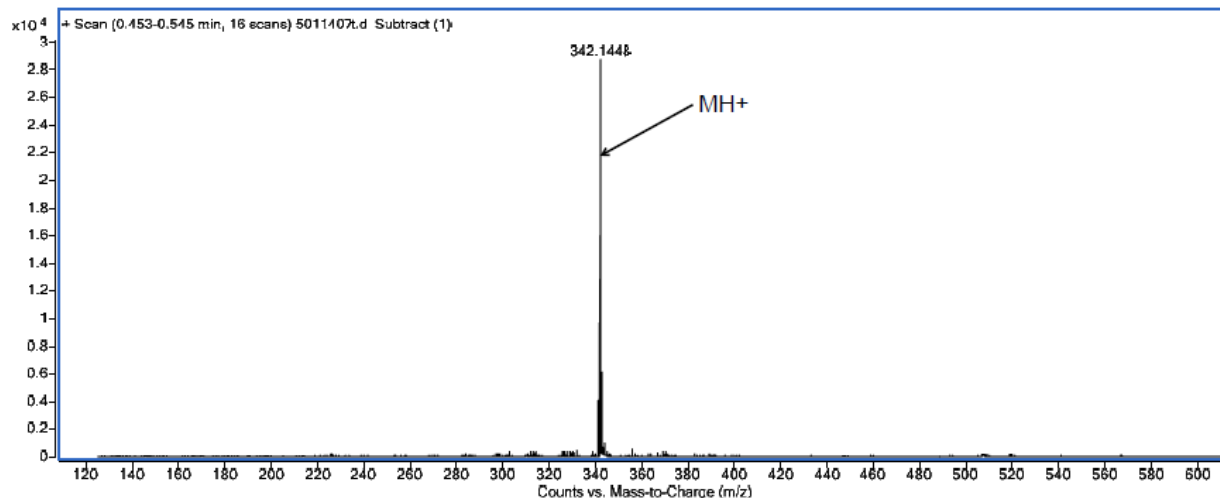

Measured Mass

342.1448

| <u>Element</u> | <u>Low Limit</u> | <u>High Limit</u> |
|----------------|------------------|-------------------|
| C              | 10               | 25                |
| H              | 5                | 25                |
| N              | 0                | 5                 |
| O              | 0                | 6                 |

| <u>Formula</u>                                                | <u>Calculated Mass</u> | <u>mDaError</u> | <u>ppmError</u> | <u>RDB</u> |
|---------------------------------------------------------------|------------------------|-----------------|-----------------|------------|
| C <sub>18</sub> H <sub>20</sub> N <sub>3</sub> O <sub>4</sub> | 342.1448               | 0.0             | -0.1            | 10.5       |
| C <sub>20</sub> H <sub>22</sub> O <sub>5</sub>                | 342.1462               | -1.4            | -4.0            | 10         |

*Representative HRMS spectra of compound 4-(4-methoxyphenyl)-5-(3,4,5-trimethoxyphenyl)-2H-1,2,3-triazole (2l)*

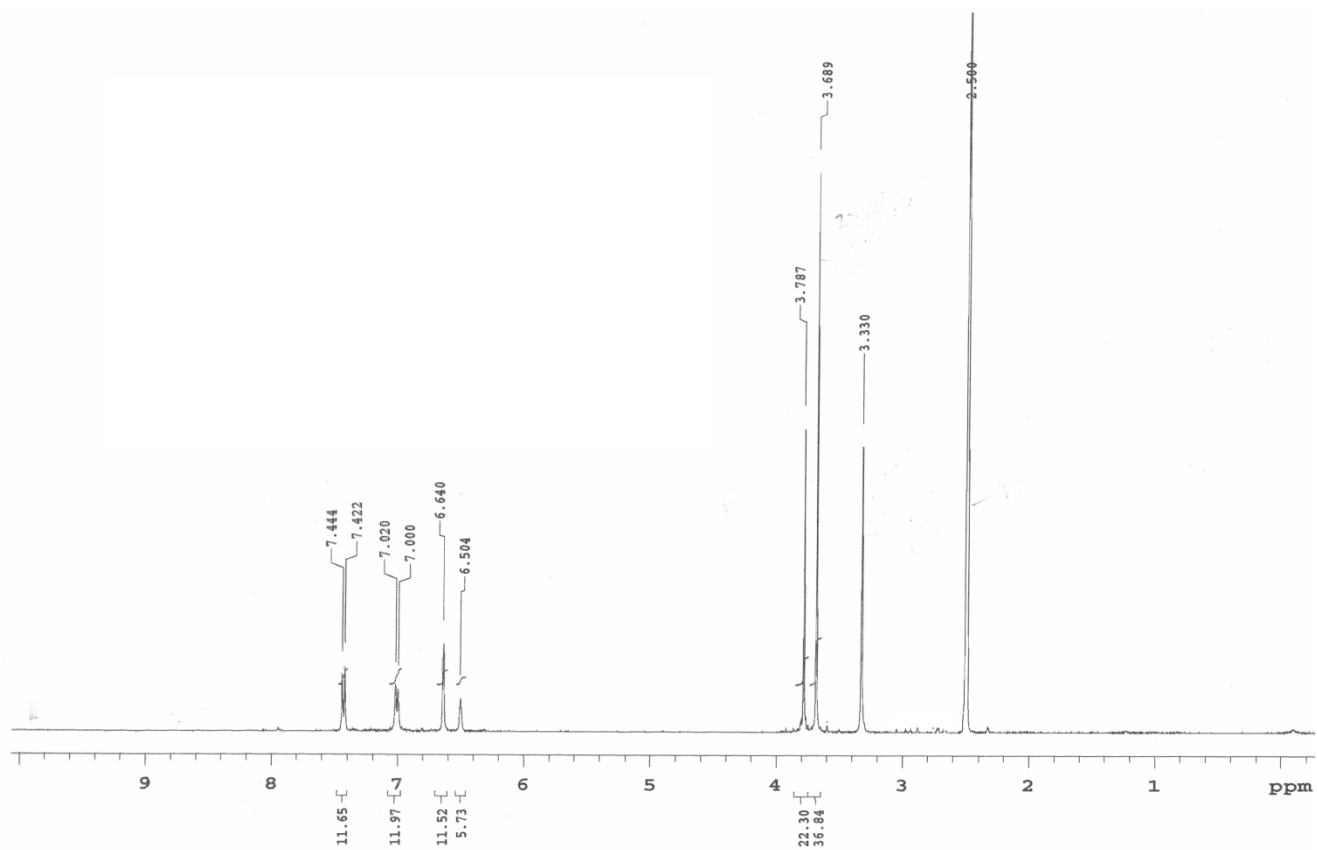

**Representative <sup>1</sup>H NMR spectra of compound 4-(3,5-dimethoxyphenyl)-5-(4-methoxyphenyl)-2H-1,2,3-triazole (2m):**

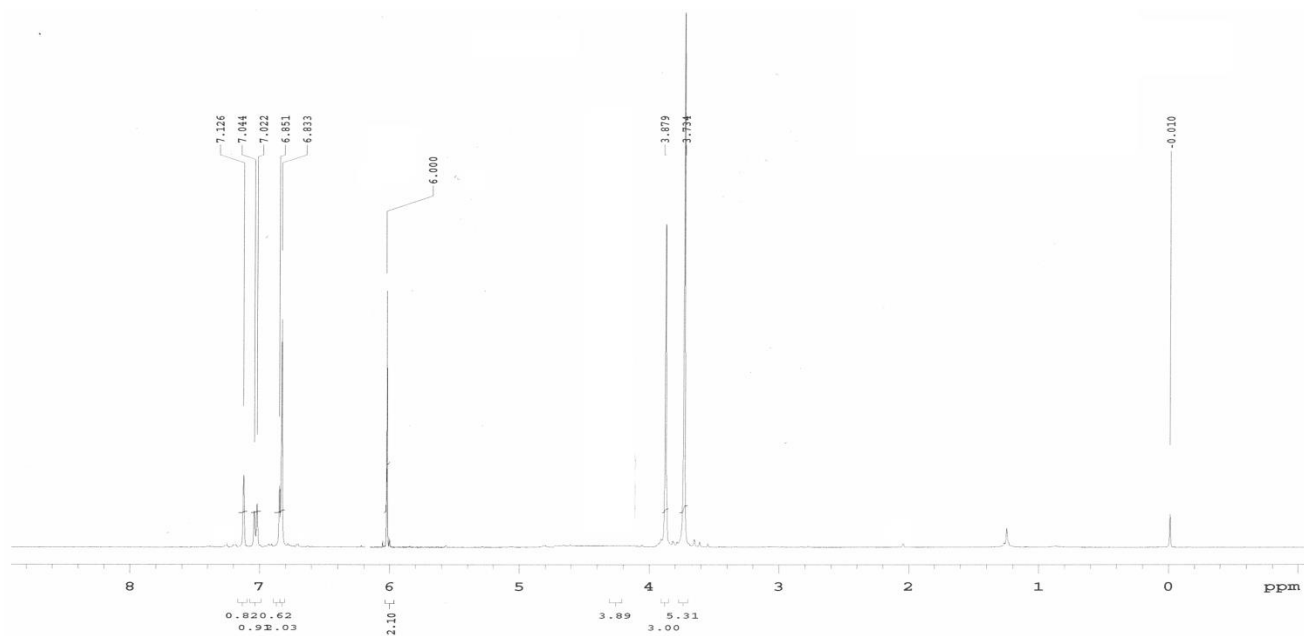

**Representative  $^1\text{H}$  NMR spectra of 4-(benzo[d][1,3]dioxol-5-yl)-5-(3,4,5-trimethoxyphenyl)-2H-1,2,3-triazole (2n)**

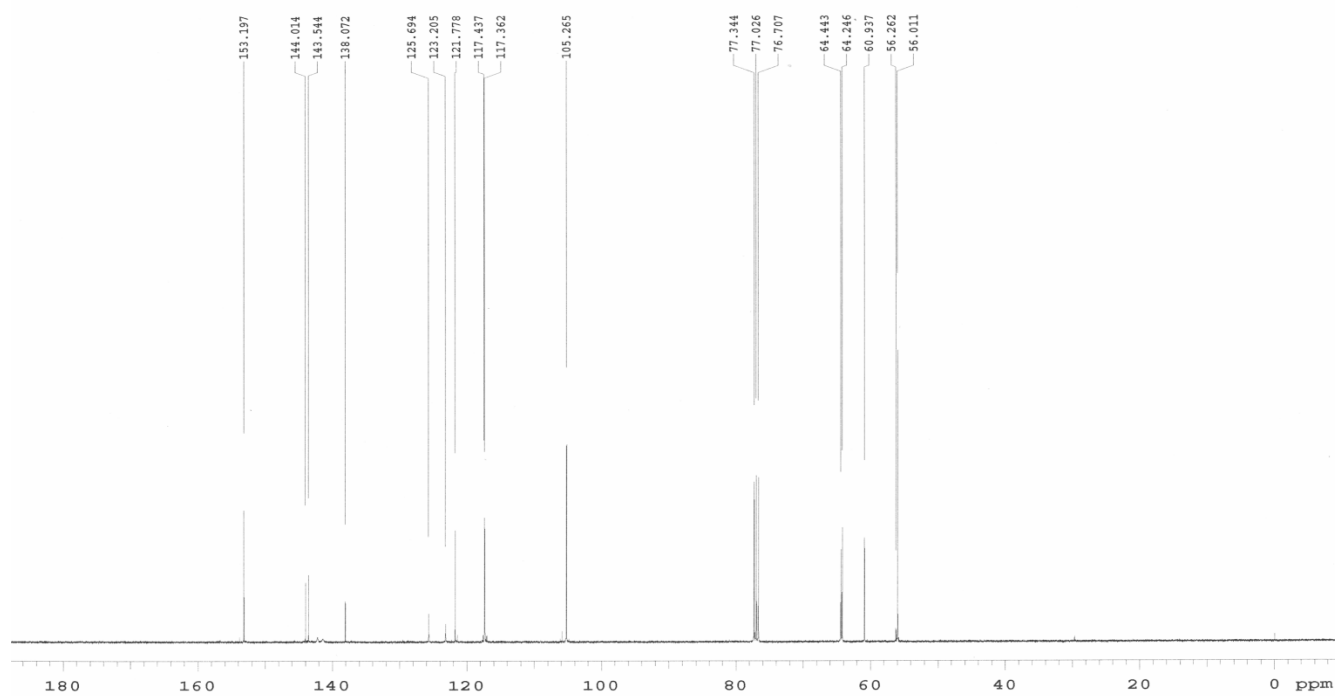

**Representative  $^{13}\text{C}$  NMR spectra of compound 4-(benzo[d][1,3]dioxol-5-yl)-5-(3,4,5-trimethoxyphenyl)-2H-1,2,3-triazole (2n)**

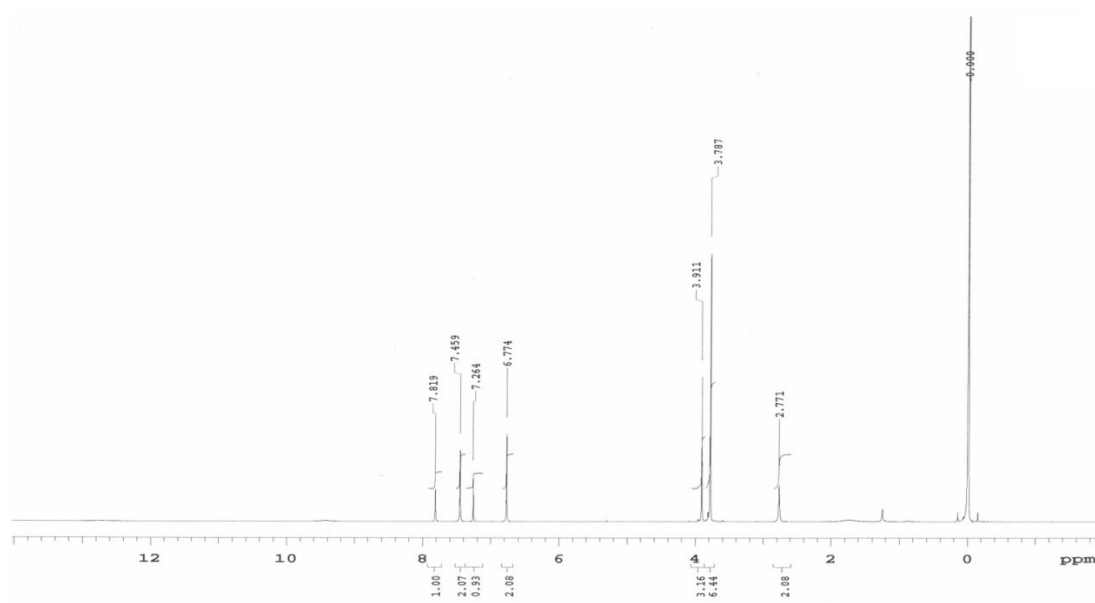

Representative  $^1\text{H}$  NMR spectra of compound 4-(3,4-dichlorophenyl)-5-(3,4,5-trimethoxyphenyl)-2H-1,2,3-triazole (2o)

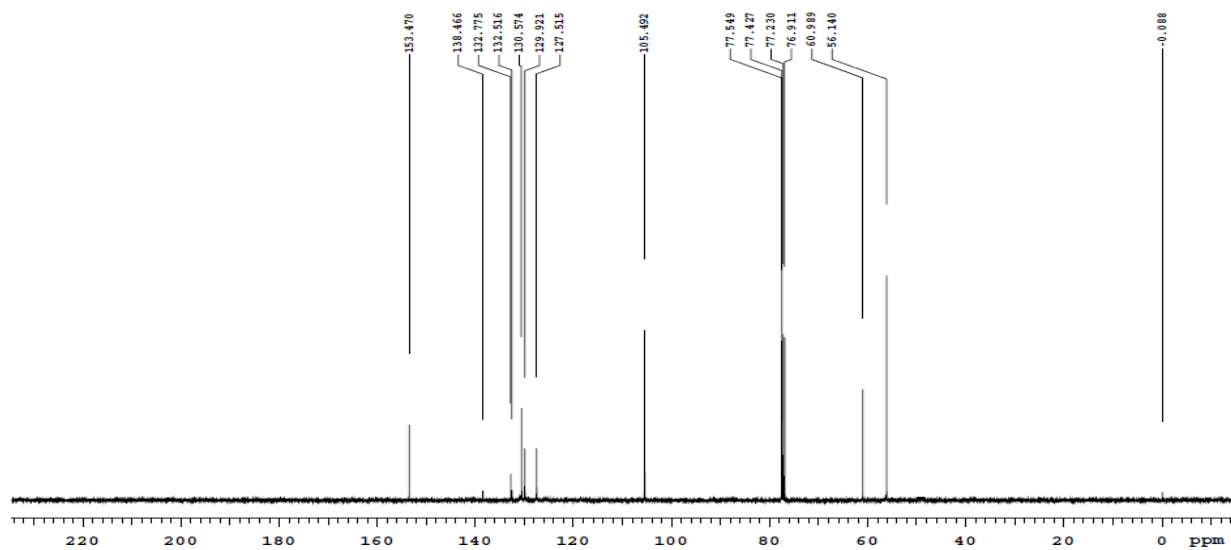

Representative  $^{13}\text{C}$  NMR spectra of compound 4-(3,4-dichlorophenyl)-5-(3,4,5-trimethoxyphenyl)-2H-1,2,3-triazole (2o)

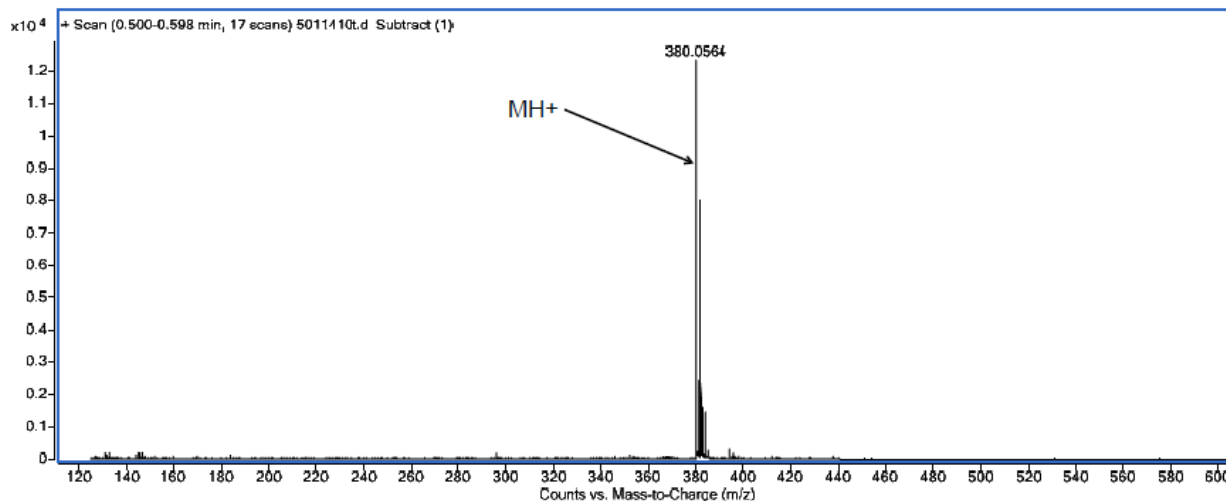

Measured Mass

380.0564

| <u>Element</u> | <u>Low Limit</u> | <u>High Limit</u> |
|----------------|------------------|-------------------|
| C              | 10               | 25                |
| H              | 5                | 25                |
| N              | 0                | 5                 |
| O              | 0                | 6                 |
| Cl             | 0                | 2                 |

| <u>Formula</u>                                                                | <u>Calculated Mass</u> | <u>mDaError</u> | <u>ppmError</u> | <u>RDB</u> |
|-------------------------------------------------------------------------------|------------------------|-----------------|-----------------|------------|
| C <sub>17</sub> H <sub>16</sub> N <sub>3</sub> O <sub>3</sub> Cl <sub>2</sub> | 380.0563               | 0.1             | 0.2             | 10.5       |
| C <sub>24</sub> H <sub>6</sub> N <sub>5</sub> O                               | 380.0567               | -0.3            | -0.8            | 24.5       |
| C <sub>20</sub> H <sub>13</sub> N <sub>2</sub> O <sub>4</sub> Cl              | 380.0558               | 0.6             | 1.5             | 15         |
| C <sub>23</sub> H <sub>10</sub> N <sub>5</sub> O                              | 380.0553               | 1.1             | 2.8             | 19.5       |
| C <sub>19</sub> H <sub>18</sub> O <sub>4</sub> Cl <sub>2</sub>                | 380.0577               | -1.3            | -3.3            | 10         |

*Representative HRMS spectra of compound 4-(3,4-dichlorophenyl)-5-(3,4,5-trimethoxyphenyl)-2H-1,2,3-triazole (2o)*

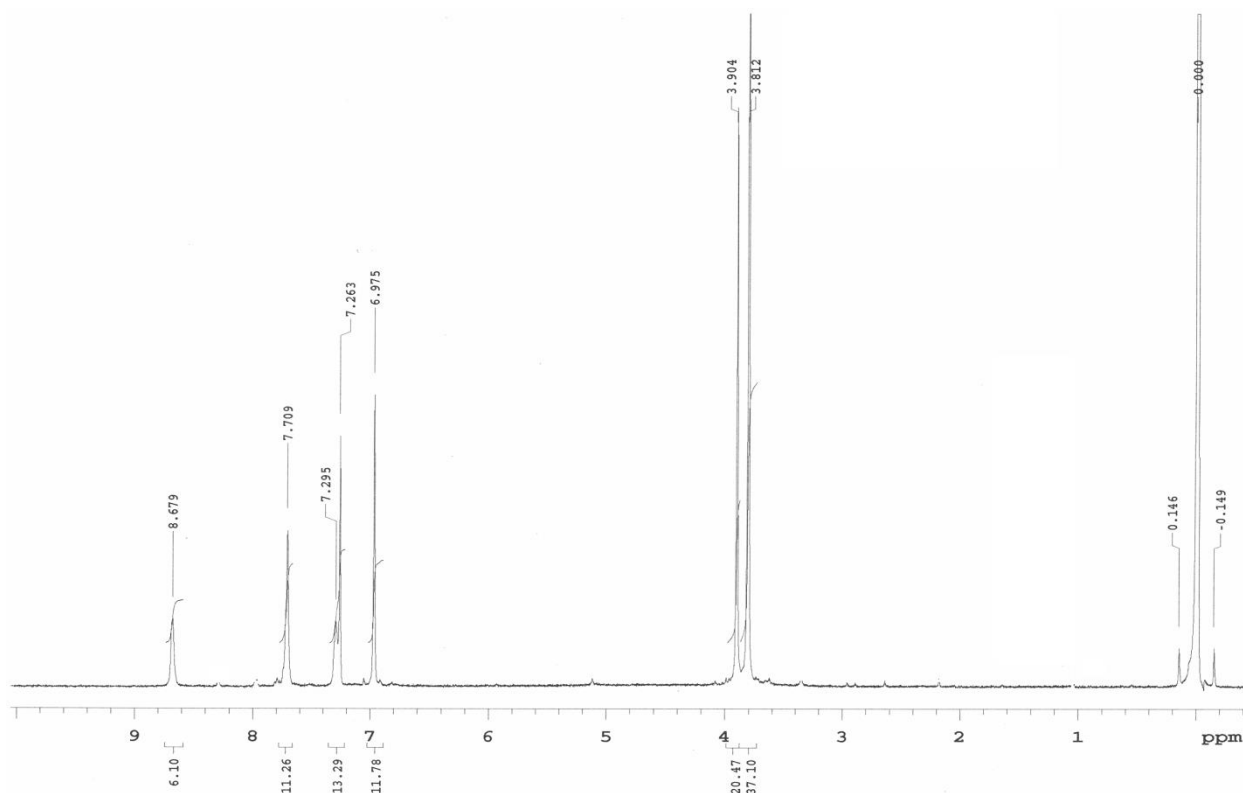

Representative  $^1\text{H}$  NMR spectra of compound 2-(5-(3,4,5-trimethoxyphenyl)-2H-1,2,3-triazol-4-yl)pyridine (2p)

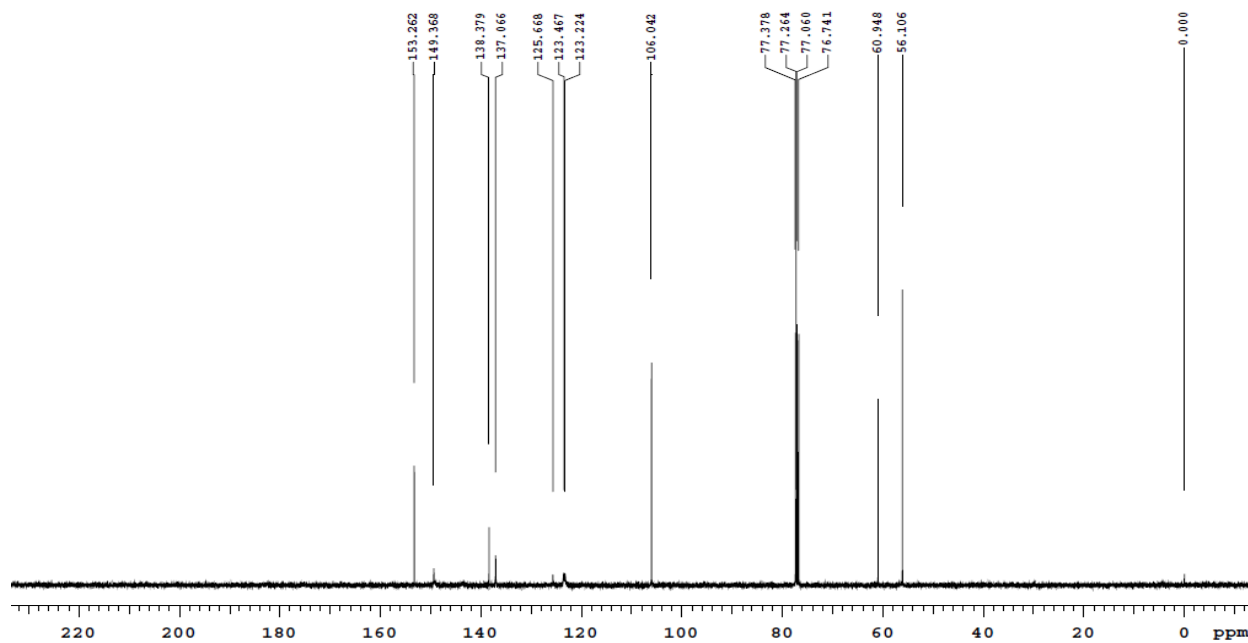

Representative  $^{13}\text{C}$  NMR spectra of compound 2-(5-(3,4,5-trimethoxyphenyl)-2H-1,2,3-triazol-4-yl)pyridine (2p)

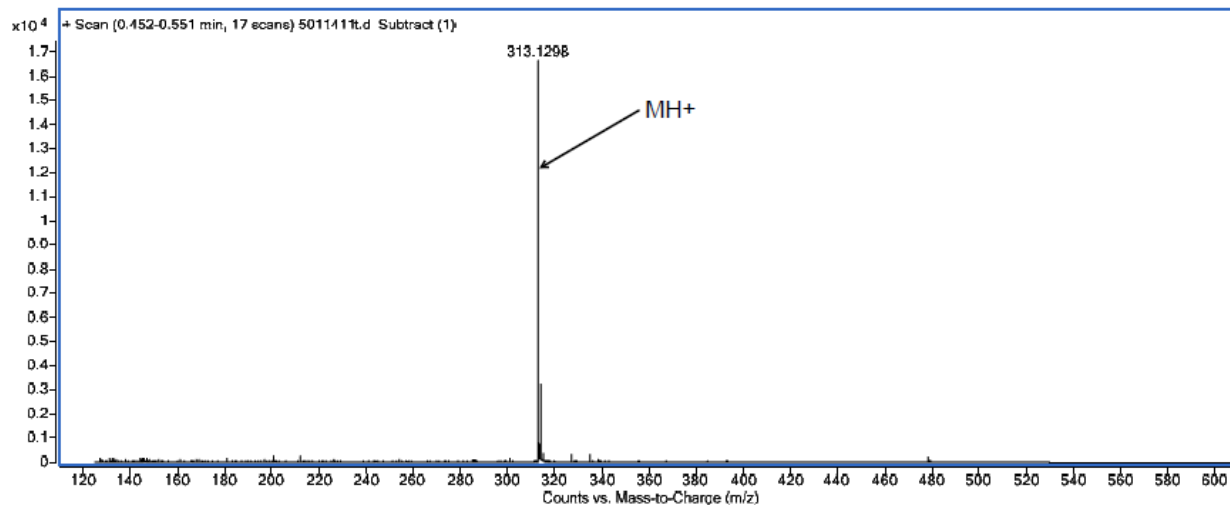

Measured Mass

313.1298

| <u>Element</u> | <u>Low Limit</u> | <u>High Limit</u> |
|----------------|------------------|-------------------|
| C              | 10               | 25                |
| H              | 5                | 25                |
| N              | 0                | 5                 |
| O              | 0                | 6                 |

| <u>Formula</u>                                                | <u>Calculated Mass</u> | <u>mDaError</u> | <u>ppmError</u> | <u>RDB</u> |
|---------------------------------------------------------------|------------------------|-----------------|-----------------|------------|
| C <sub>16</sub> H <sub>17</sub> N <sub>4</sub> O <sub>3</sub> | 313.1295               | 0.3             | 0.9             | 10.5       |
| C <sub>18</sub> H <sub>19</sub> N <sub>4</sub> O <sub>4</sub> | 313.1309               | -1.1            | -3.4            | 10         |

*Representative HRMS spectra of compound 2-(5-(3,4,5-trimethoxyphenyl)-2H-1,2,3-triazol-4-yl)pyridine (2p)*

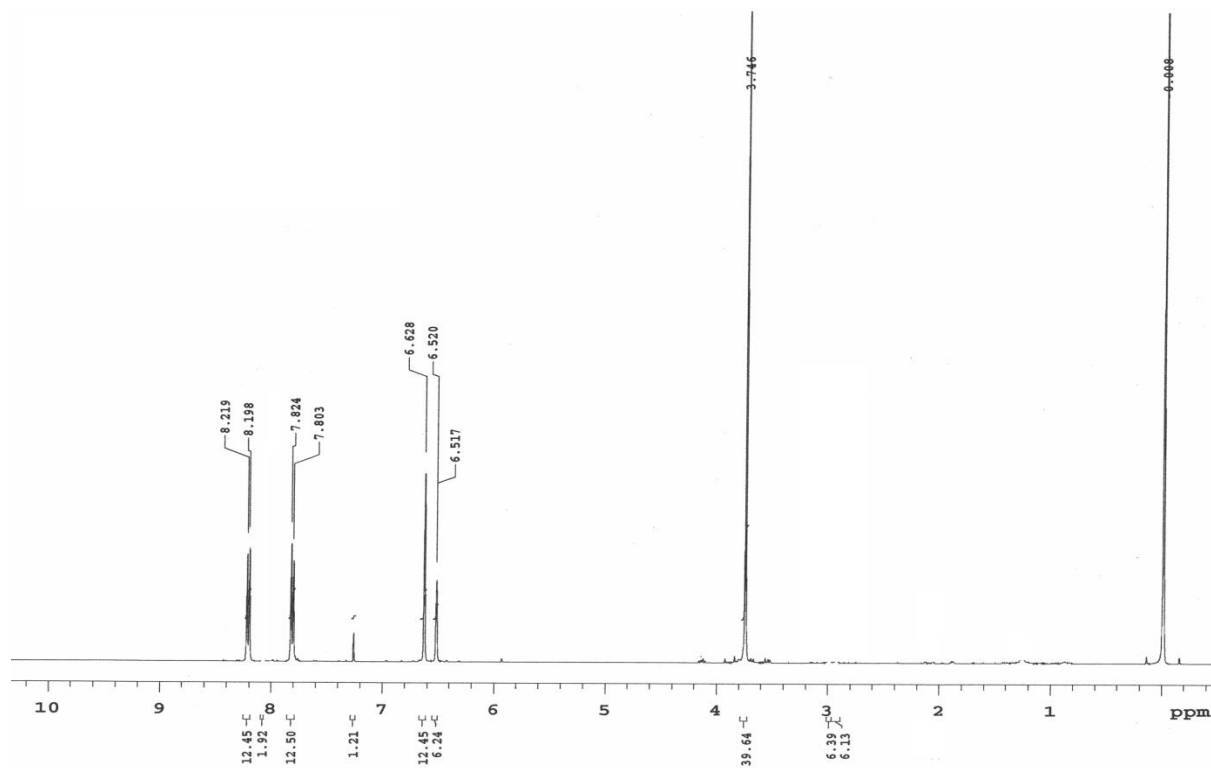

Representative  $^1\text{H}$  NMR spectra of compound 4-(3,5-dimethoxyphenyl)-5-(4-nitrophenyl)-2H-1,2,3-triazole (2q)

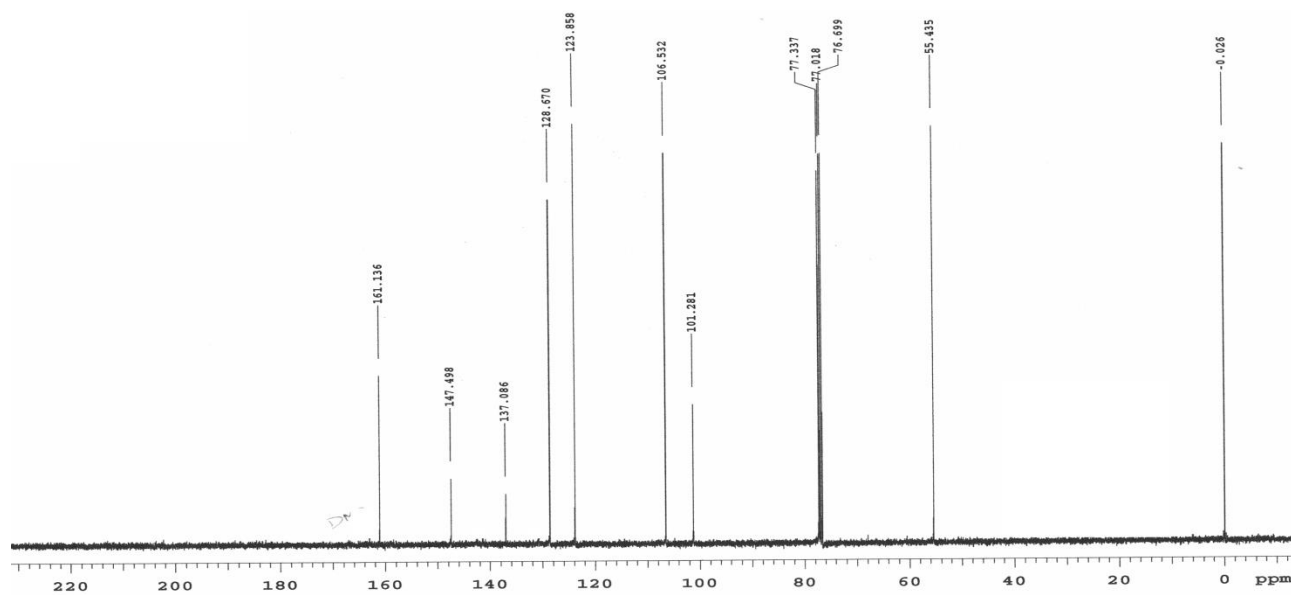

Representative  $^{13}\text{C}$  NMR spectra of compound 4-(3,5-dimethoxyphenyl)-5-(4-nitrophenyl)-2H-1,2,3-triazole (2q)



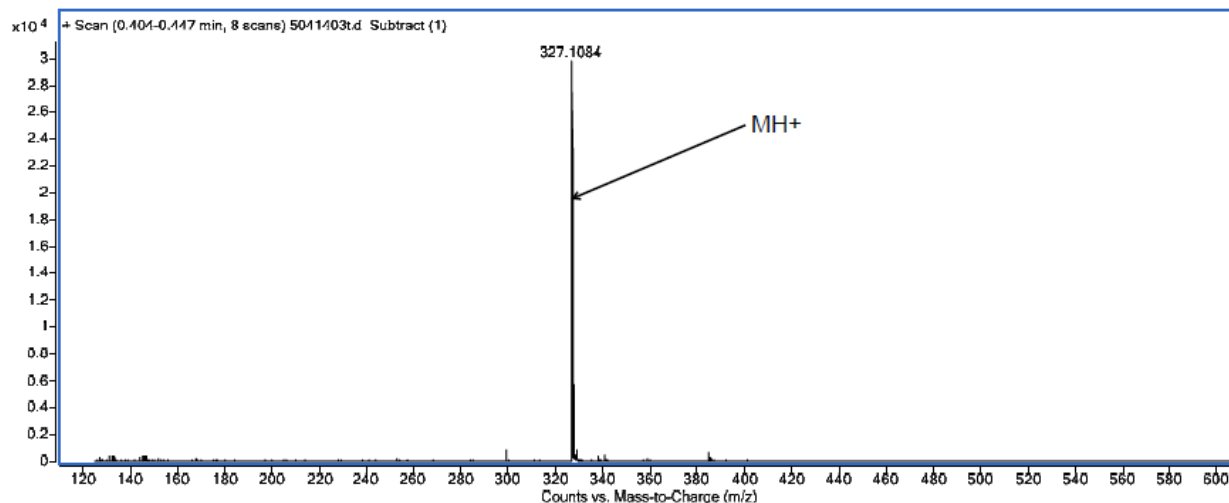

Measured Mass

327.1084

| <u>Element</u> | <u>Low Limit</u> | <u>High Limit</u> |
|----------------|------------------|-------------------|
| C              | 10               | 25                |
| H              | 5                | 25                |
| N              | 0                | 5                 |
| O              | 0                | 6                 |

| <u>Formula</u>                                                | <u>Calculated Mass</u> | <u>mDaError</u> | <u>ppmError</u> | <u>RDB</u> |
|---------------------------------------------------------------|------------------------|-----------------|-----------------|------------|
| C <sub>16</sub> H <sub>15</sub> N <sub>4</sub> O <sub>4</sub> | 327.1088               | -0.4            | -1.2            | 11.5       |

*Representative HRMS spectra of compound 4-(3,5-dimethoxyphenyl)-5-(4-nitrophenyl)-2H-1,2,3-triazole (2q)*

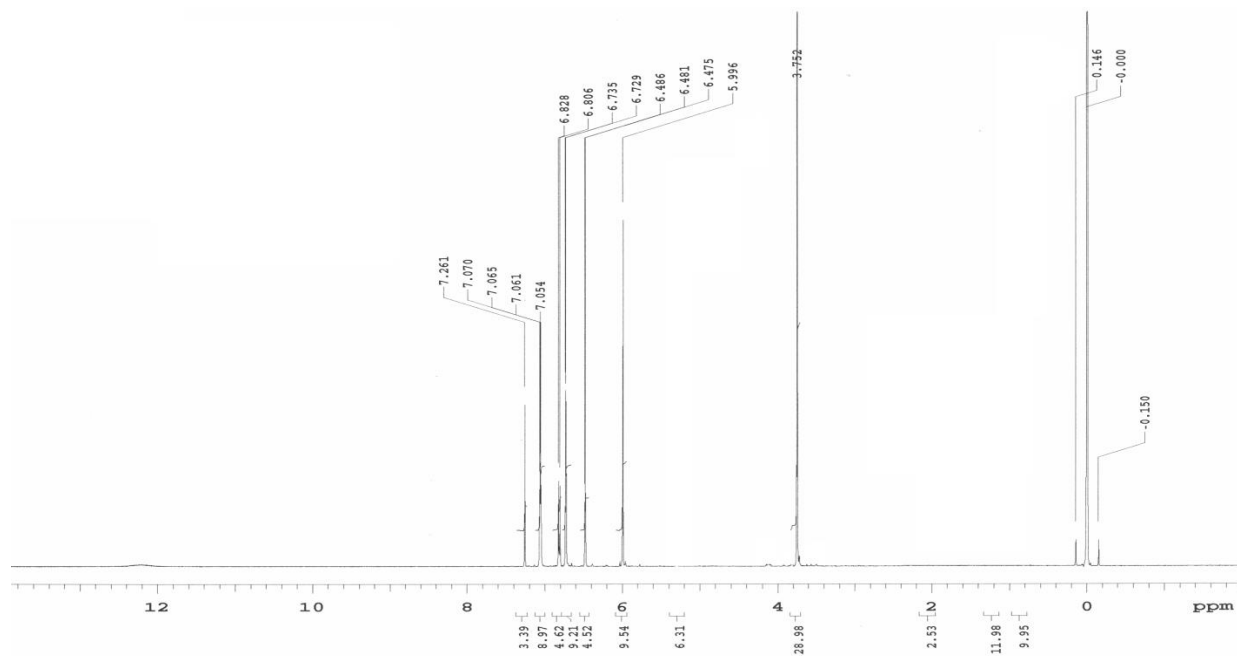

Representative  $^1\text{H}$  NMR spectra of compound 4-(benzo[d][1,3]dioxol-5-yl)-5-(3,5-dimethoxyphenyl)-2H-1,2,3-triazole (2r)

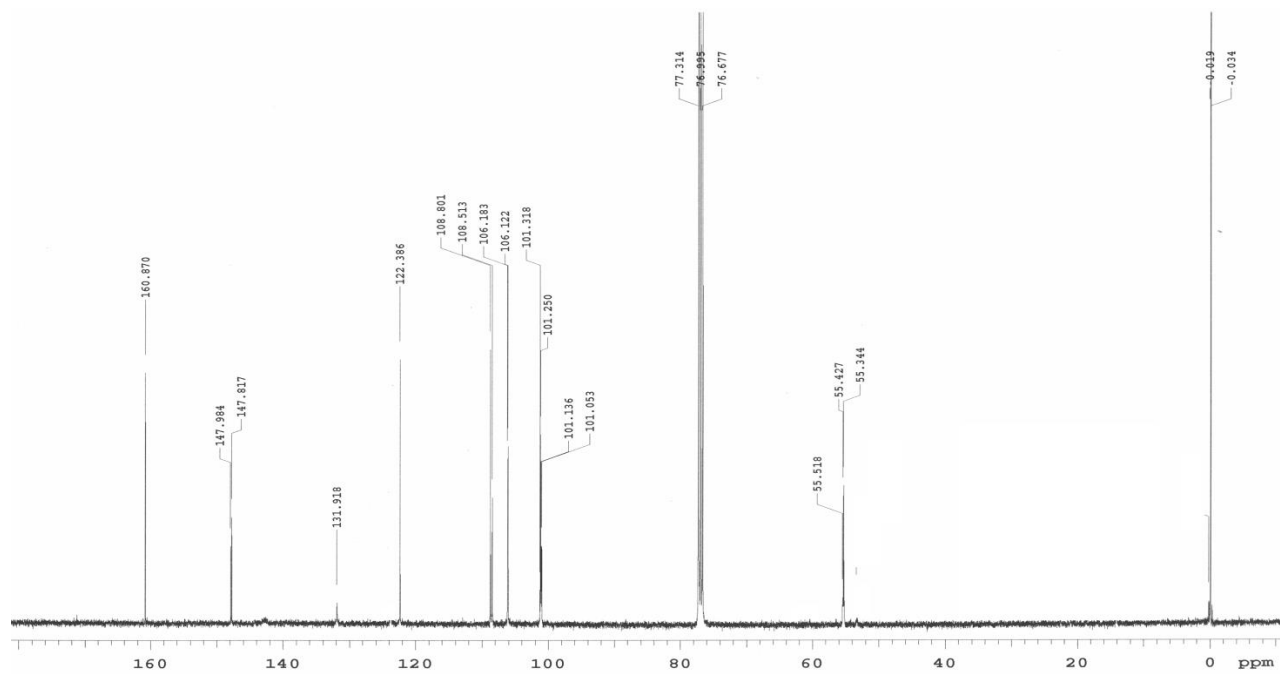

Representative  $^{13}\text{C}$  NMR spectra of compound 4-(benzo[d][1,3]dioxol-5-yl)-5-(3,5-dimethoxyphenyl)-2H-1,2,3-triazole (2r)

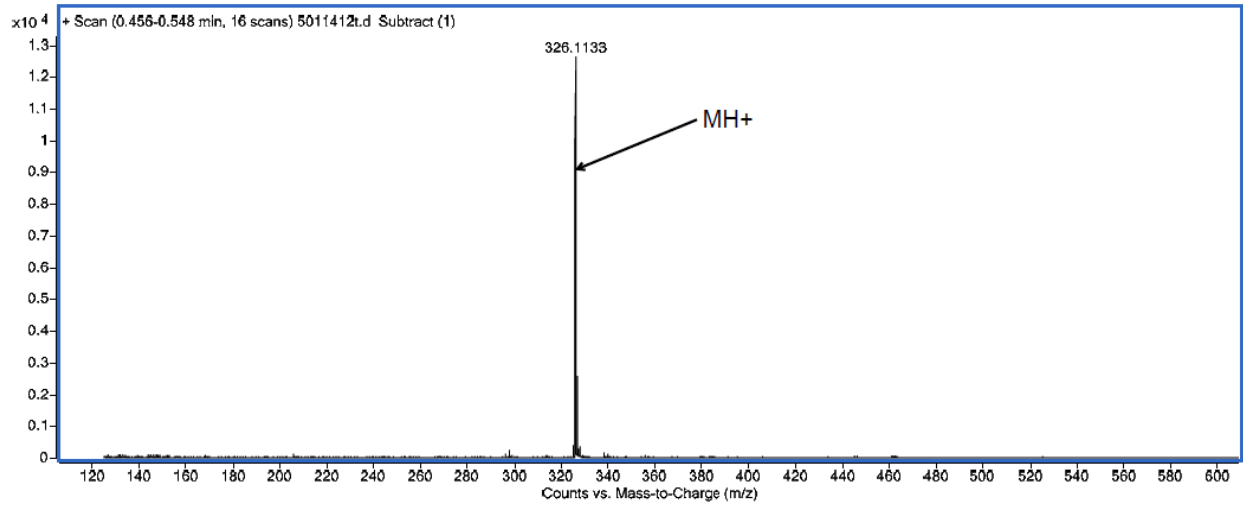

Measured Mass 326.1133

| <u>Element</u> | <u>Low Limit</u> | <u>High Limit</u> |
|----------------|------------------|-------------------|
| C              | 10               | 25                |
| H              | 5                | 25                |
| N              | 0                | 5                 |
| O              | 0                | 6                 |

| <u>Formula</u>                                                | <u>Calculated Mass</u> | <u>mDaError</u> | <u>ppmError</u> | <u>RDB</u> |
|---------------------------------------------------------------|------------------------|-----------------|-----------------|------------|
| C <sub>17</sub> H <sub>16</sub> N <sub>3</sub> O <sub>4</sub> | 326.1135               | -0.2            | -0.7            | 11.5       |
| C <sub>19</sub> H <sub>18</sub> O <sub>5</sub>                | 326.1149               | -1.6            | -4.8            | 11         |

*Representative HRMS spectra of compound 4-(benzo[d][1,3]dioxol-5-yl)-5-(3,5-dimethoxyphenyl)-2H-1,2,3-triazole (2r)*

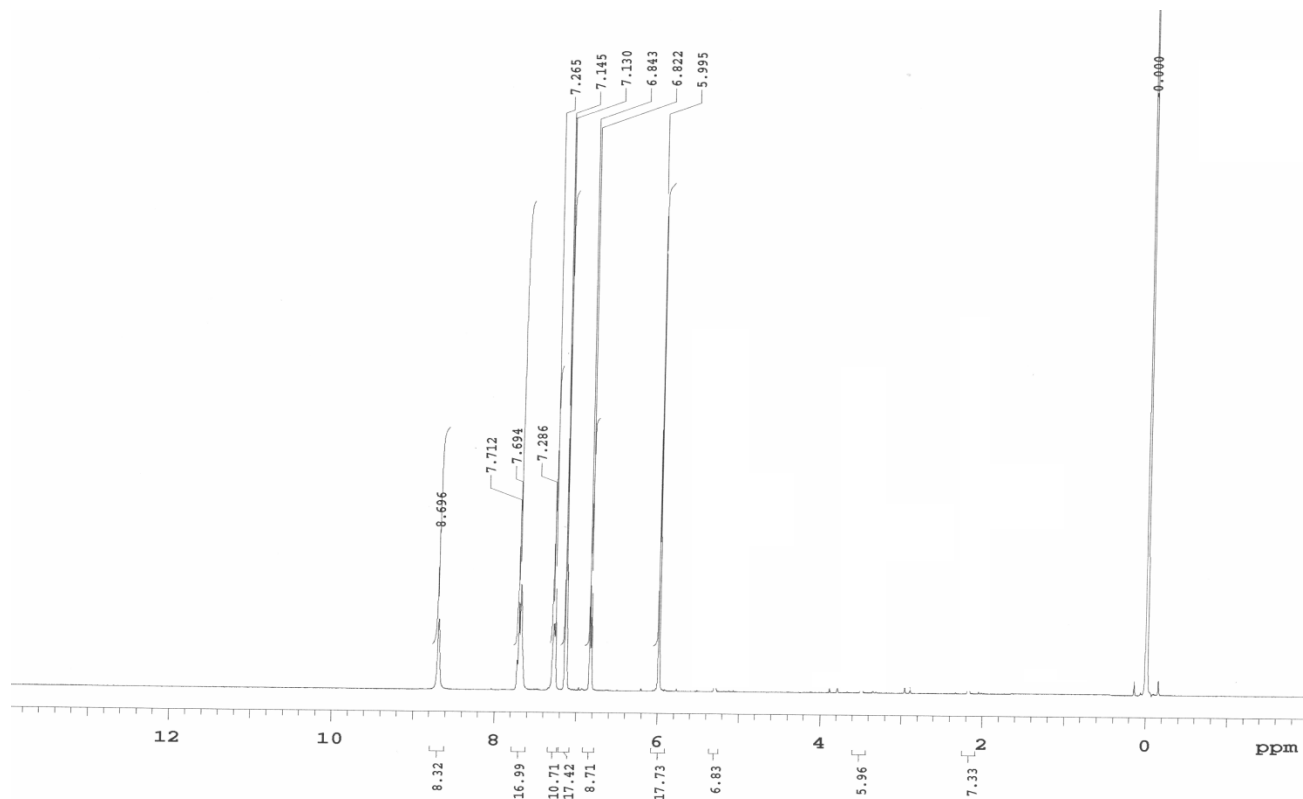

Representative  $^1\text{H}$  NMR spectra of compound 2-(5-(benzo[d][1,3]dioxol-5-yl)-2H-1,2,3-triazol-4-yl)pyridine (2s)

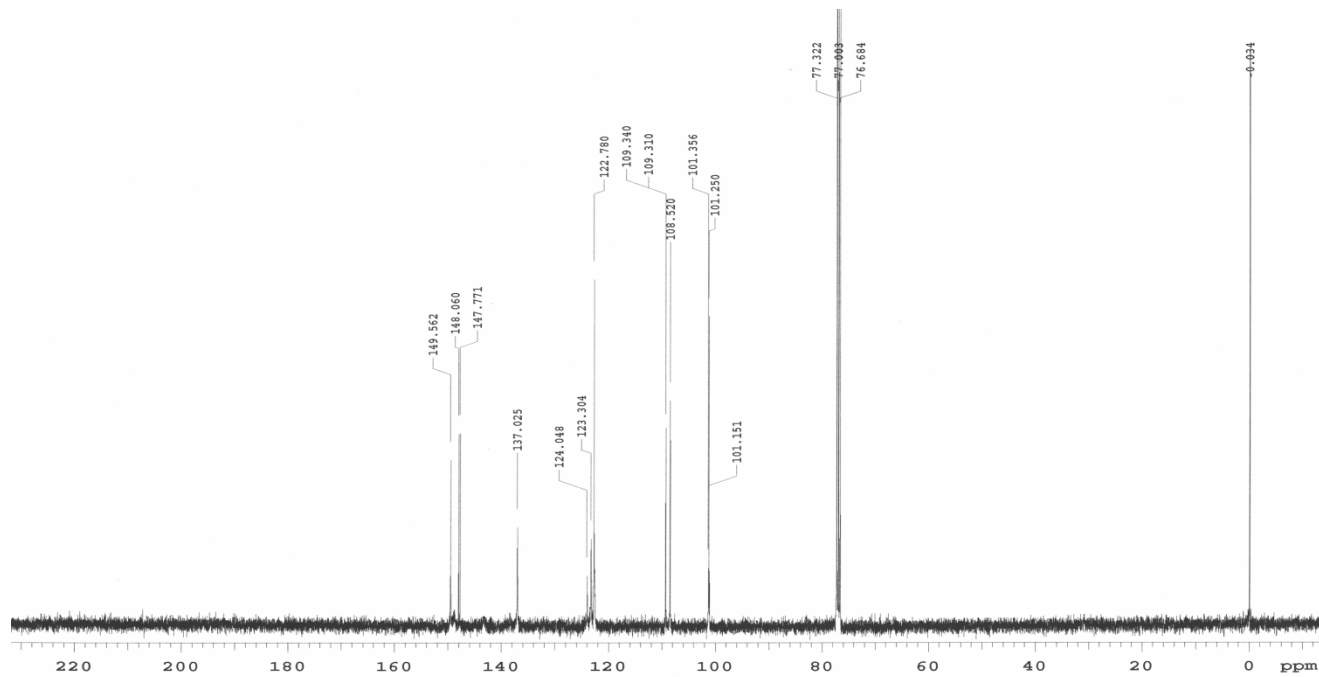

Representative  $^{13}\text{C}$  NMR spectra of compound 2-(5-(benzo[d][1,3]dioxol-5-yl)-2H-1,2,3-triazol-4-yl)pyridine (2s)

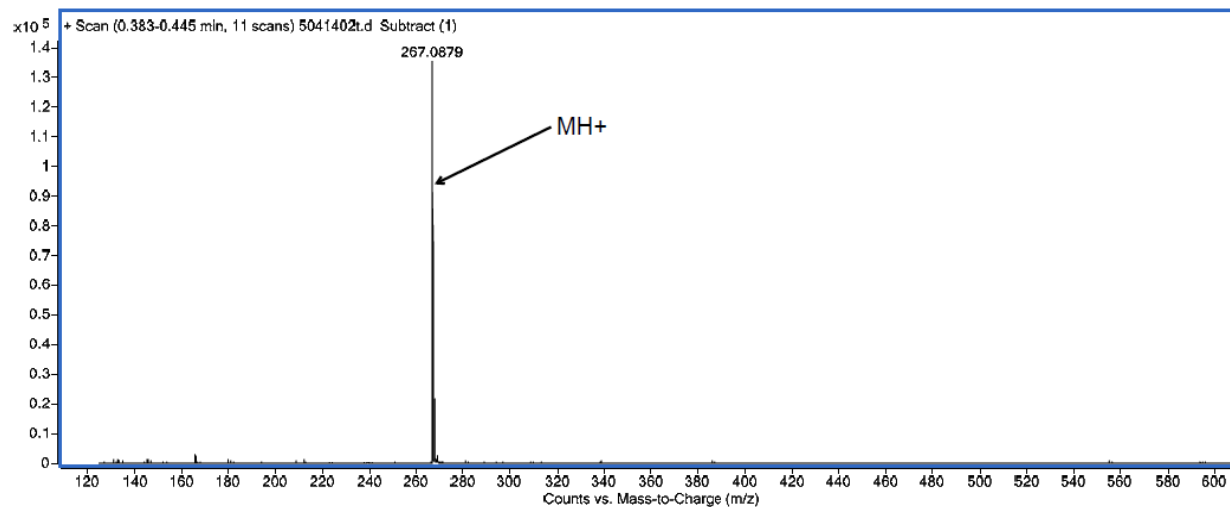

Measured Mass

267.0879

| <u>Element</u> | <u>Low Limit</u> | <u>High Limit</u> |
|----------------|------------------|-------------------|
| C              | 10               | 25                |
| H              | 5                | 25                |
| N              | 0                | 5                 |
| O              | 0                | 6                 |

| <u>Formula</u>                                                | <u>Calculated Mass</u> | <u>mDaError</u> | <u>ppmError</u> | <u>RDB</u> |
|---------------------------------------------------------------|------------------------|-----------------|-----------------|------------|
| C <sub>14</sub> H <sub>11</sub> N <sub>4</sub> O <sub>2</sub> | 267.0877               | 0.2             | 0.9             | 11.5       |
| C <sub>16</sub> H <sub>13</sub> N O <sub>3</sub>              | 267.0890               | -1.1            | -4.1            | 11         |

*Representative HRMS spectra of compound 2-(5-(benzo[d][1,3]dioxol-5-yl)-2H-1,2,3-triazol-4-yl)pyridine (2s)*
